# Supplementary material
Source: PubMed Central journal article supplement (PMC3637356)
Supplement: cc-12-972-s01.pdf [file cc-12-972-s01.pdf]

## **Supplemental Material to:**

**Mamadou Keita, Magdalena Bachvarova, Chantale Morin,  
Marie Plante, Jean Gregoire, Marie-Claude Renaud,  
Alexandra Sebastianelli, Xuan Bich Trinh  
and Dimcho Bachvarov**

**The RUNX1 transcription factor is expressed in serous  
epithelial ovarian carcinoma and contributes to cell  
proliferation, migration and invasion**

**2013; 12(6)**

**<http://dx.doi.org/10.4161/cc.23963>**

**<http://www.landesbioscience.com/journals/cc/article/23963>**

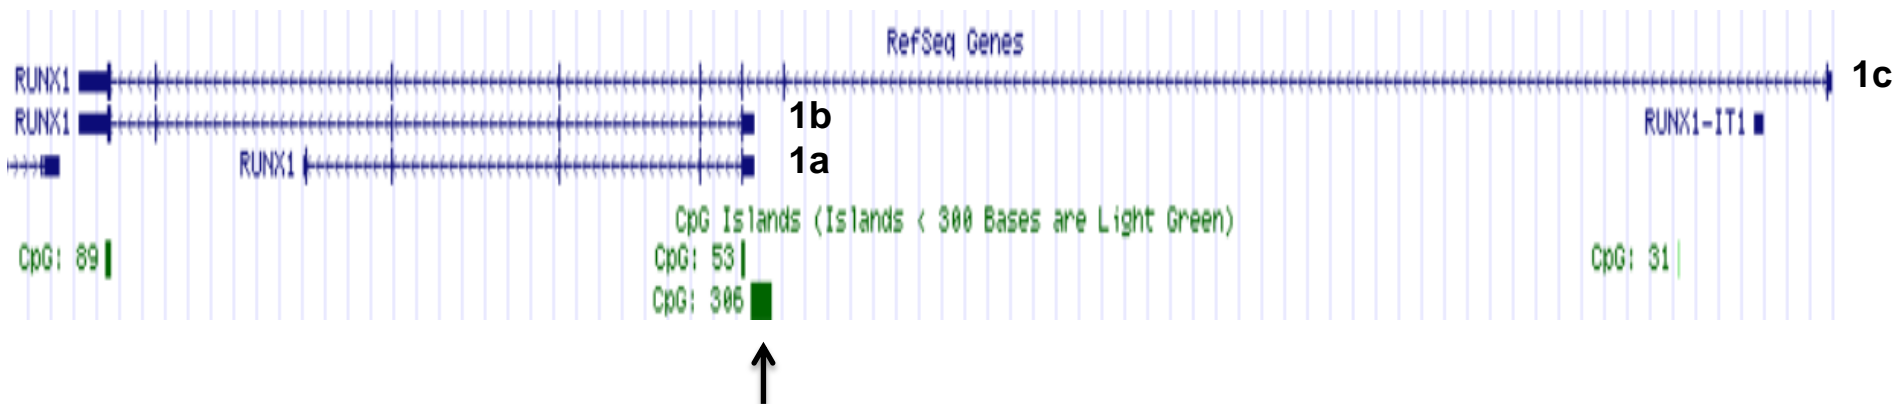

Supplemental Figure 1. Genomic structure of the RUNX1 gene isoforms 1a, 1b and 1c. The CpG island (CpG 306) containing the analyzed 13 putative CpG methylation targets is indicated with arrow.

**Supplemental Table 1. Genes, differentially expressed in SKOV3 cells (≥ 2 fold) following RUNX1 knockdown**

Genes in bold represent potential RUNX1 target genes, containing a conserved RUNX1 binding site(s) in their regulatory regions

**A. Upregulated genes**

| Normalized Data | Genbank             | Description                                                                                                                                                 |
|-----------------|---------------------|-------------------------------------------------------------------------------------------------------------------------------------------------------------|
| 45.89           | NM_178821           | Homo sapiens WD repeat domain 69 (WDR69), mRNA [NM_178821]                                                                                                  |
| 31.28           | <b>NM_000575</b>    | Homo sapiens interleukin 1, alpha (IL1A), mRNA [NM_000575]                                                                                                  |
| 22.58           | <b>NM_012242</b>    | Homo sapiens dickkopf homolog 1 (Xenopus laevis) (DKK1), mRNA [NM_012242]                                                                                   |
| 19.41           | NM_000584           | Homo sapiens interleukin 8 (IL8), mRNA [NM_000584]                                                                                                          |
| 16.61           | <b>NM_016607</b>    | Homo sapiens armadillo repeat containing, X-linked 3 (ARMCX3), transcript variant 1, mRNA [NM_016607]                                                       |
| 14.12           | NM_002354           | Homo sapiens tumor-associated calcium signal transducer 1 (TACSTD1), mRNA [NM_002354]                                                                       |
| 12.97           | NM_003004           | Homo sapiens secreted and transmembrane 1 (SECTM1), mRNA [NM_003004]                                                                                        |
| 12.76           | NM_182707           | Homo sapiens pregnancy specific beta-1-glycoprotein 8 (PSG8), mRNA [NM_182707]                                                                              |
| 12.56           | NM_002349           | Homo sapiens lymphocyte antigen 75 (LY75), mRNA [NM_002349]                                                                                                 |
| 12.45           | NM_002276           | Homo sapiens keratin 19 (KRT19), mRNA [NM_002276]                                                                                                           |
| 12.20           | <b>NM_000576</b>    | Homo sapiens interleukin 1, beta (IL1B), mRNA [NM_000576]                                                                                                   |
| 12.10           | <b>NM_053036</b>    | Homo sapiens G protein-coupled receptor 74 (GPR74), transcript variant 2, mRNA [NM_053036]                                                                  |
| 11.61           | NM_019007           | Homo sapiens armadillo repeat containing, X-linked 6 (ARMCX6), transcript variant 1, mRNA [NM_019007]                                                       |
| 11.56           | <b>NM_006108</b>    | Homo sapiens spondin 1, extracellular matrix protein (SPON1), mRNA [NM_006108]                                                                              |
| 11.51           | NM_002782           | Homo sapiens pregnancy specific beta-1-glycoprotein 6 (PSG6), mRNA [NM_002782]                                                                              |
| 11.41           | <b>NM_001147</b>    | Homo sapiens angiotensin II (ANGPT2), mRNA [NM_001147]                                                                                                      |
| 11.11           | <b>NM_000087</b>    | Homo sapiens cyclic nucleotide gated channel alpha 1 (CNGA1), mRNA [NM_000087]                                                                              |
| 11.11           | NM_021016           | Homo sapiens pregnancy specific beta-1-glycoprotein 3 (PSG3), mRNA [NM_021016]                                                                              |
| 10.98           | <b>NM_022138</b>    | Homo sapiens SPARC related modular calcium binding 2 (SMOC2), mRNA [NM_022138]                                                                              |
| 10.35           | <b>NM_000693</b>    | Homo sapiens aldehyde dehydrogenase 1 family, member A3 (ALDH1A3), mRNA [NM_000693]                                                                         |
| 10.28           | NM_000494           | Homo sapiens collagen, type XVII, alpha 1 (COL17A1), transcript variant long, mRNA [NM_000494]                                                              |
| 10.06           | <b>NM_001993</b>    | Homo sapiens coagulation factor III (thromboplastin, tissue factor) (F3), mRNA [NM_001993]                                                                  |
| 9.82            | <b>NM_001014811</b> | Homo sapiens malic enzyme 3, NAD(P)+-dependent, mitochondrial (ME3), nuclear gene encoding mitochondrial protein, transcript variant 2, mRNA [NM_001014811] |
| 9.72            | <b>NM_002345</b>    | Homo sapiens lumican (LUM), mRNA [NM_002345]                                                                                                                |
| 9.66            | NM_000358           | Homo sapiens transforming growth factor, beta-induced, 68kDa (TGFB1), mRNA [NM_000358]                                                                      |
| 9.30            | <b>NM_001562</b>    | Homo sapiens interleukin 18 (interferon-gamma-inducing factor) (IL18), mRNA [NM_001562]                                                                     |
| 9.28            | NM_002784           | Homo sapiens pregnancy specific beta-1-glycoprotein 9 (PSG9), mRNA [NM_002784]                                                                              |
| 9.27            | NM_174912           | Homo sapiens hypothetical protein FLJ131204 (FLJ131204), mRNA [NM_174912]                                                                                   |
| 9.24            | NM_004707           | Homo sapiens APG12 autophagy 12-like (S. cerevisiae) (APG12L), mRNA [NM_004707]                                                                             |
| 9.19            | NM_006905           | Homo sapiens pregnancy specific beta-1-glycoprotein 1 (PSG1), mRNA [NM_006905]                                                                              |
| 9.16            | NM_194294           | Homo sapiens hypothetical protein LOC169355 (LOC169355), mRNA [NM_194294]                                                                                   |
| 9.03            | NM_014945           | Homo sapiens actin binding LIM protein family, member 3 (ABLIM3), mRNA [NM_014945]                                                                          |
| 8.90            | NM_002785           | Homo sapiens pregnancy specific beta-1-glycoprotein 11 (PSG11), transcript variant 1, mRNA [NM_002785]                                                      |
| 8.81            | NM_052960           | Homo sapiens retinol binding protein 7, cellular (RBP7), mRNA [NM_052960]                                                                                   |
| 8.69            | NM_004848           | Homo sapiens chromosome 1 open reading frame 38 (C1orf38), mRNA [NM_004848]                                                                                 |
| 8.67            | NM_001012334        | Homo sapiens midkine (neurite growth-promoting factor 2) (MDK), transcript variant 1, mRNA [NM_001012334]                                                   |
| 8.19            | NM_021977           | Homo sapiens solute carrier family 22 (extraneuronal monoamine transporter), member 3 (SLC22A3), mRNA [NM_021977]                                           |
| 8.14            | <b>NM_021634</b>    | Homo sapiens leucine-rich repeat-containing G protein-coupled receptor 7 (LGR7), mRNA [NM_021634]                                                           |
| 8.12            | NM_153333           | Homo sapiens transcription elongation factor A (SII)-like 8 (TCEAL8), transcript variant 1, mRNA [NM_153333]                                                |
| 8.09            | <b>NM_014391</b>    | Homo sapiens ankyrin repeat domain 1 (cardiac muscle) (ANKRD1), mRNA [NM_014391]                                                                            |
| 8.06            | NM_031207           | Homo sapiens hydroxyprolylase isomerase homolog (E. coli) (HYI), mRNA [NM_031207]                                                                           |
| 7.79            | <b>NM_006988</b>    | Homo sapiens alpha disintegrin-like and metalloprotease (reprolysin type) with thrombospondin type 1 motif, 1 (ADAMTS1), mRNA [NM_006988]                   |
| 7.73            | NM_005556           | Homo sapiens keratin 7 (KRT7), mRNA [NM_005556]                                                                                                             |
| 7.46            | NM_001165           | Homo sapiens baculoviral IAP repeat-containing 3 (BIRC3), transcript variant 1, mRNA [NM_001165]                                                            |
| 7.45            | NM_015431           | Homo sapiens tripartite motif-containing 58 (TRIM58), mRNA [NM_015431]                                                                                      |
| 7.38            | NM_000804           | Homo sapiens folate receptor 3 (gamma) (FOLR3), mRNA [NM_000804]                                                                                            |
| 7.19            | <b>NM_004105</b>    | Homo sapiens EGF-containing fibulin-like extracellular matrix protein 1 (EFEMP1), transcript variant 1, mRNA [NM_004105]                                    |
| 7.09            | <b>NM_078481</b>    | Homo sapiens CD97 antigen (CD97), transcript variant 1, mRNA [NM_078481]                                                                                    |
| 6.99            | <b>NM_138455</b>    | Homo sapiens collagen triple helix repeat containing 1 (CTHRC1), mRNA [NM_138455]                                                                           |
| 6.79            | <b>NM_007038</b>    | Homo sapiens alpha disintegrin-like and metalloprotease (reprolysin type) with thrombospondin type 1 motif, 5 (aggrecanase-2) (ADAMTS5), mRNA [NM_007038]   |
| 6.75            | NM_002849           | Homo sapiens protein tyrosine phosphatase, receptor type, R (PTPRR), transcript variant 1, mRNA [NM_002849]                                                 |
| 6.75            | <b>NM_021220</b>    | Homo sapiens ovo-like 2 (Drosophila) (OVOL2), mRNA [NM_021220]                                                                                              |
| 6.73            | NM_001306           | Homo sapiens claudin 3 (CLDN3), mRNA [NM_001306]                                                                                                            |
| 6.72            | <b>NM_032744</b>    | Homo sapiens chromosome 6 open reading frame 105 (C6orf105), mRNA [NM_032744]                                                                               |
| 6.71            | NM_001955           | Homo sapiens endothelin 1 (EDN1), mRNA [NM_001955]                                                                                                          |
| 6.70            | <b>NM_017923</b>    | Homo sapiens membrane-associated ring finger (C3HC4) 1 (MARCK1), mRNA [NM_017923]                                                                           |
| 6.66            | <b>NM_014668</b>    | Homo sapiens GREB1 protein (GREB1), transcript variant a, mRNA [NM_014668]                                                                                  |
| 6.58            | NM_005562           | Homo sapiens laminin, gamma 2 (LAMC2), transcript variant 1, mRNA [NM_005562]                                                                               |
| 6.47            | NM_002089           | Homo sapiens chemokine (C-X-C motif) ligand 2 (CXCL2), mRNA [NM_002089]                                                                                     |
| 6.40            | <b>NM_171998</b>    | Homo sapiens RAB39B, member RAS oncogene family (RAB39B), mRNA [NM_171998]                                                                                  |
| 6.33            | <b>NM_015687</b>    | Homo sapiens filamin A interacting protein 1 (FILIP1), mRNA [NM_015687]                                                                                     |
| 6.20            | <b>NM_203394</b>    | Homo sapiens E2F transcription factor 7 (E2F7), mRNA [NM_203394]                                                                                            |
| 6.14            | NM_001010877        | Homo sapiens zinc finger protein 311 (ZNF311), mRNA [NM_001010877]                                                                                          |
| 6.12            | NM_017527           | Homo sapiens lymphocyte antigen 6 complex, locus K (LY6K), mRNA [NM_017527]                                                                                 |
| 6.11            | NM_182964           | Homo sapiens neuron navigator 2 (NAV2), transcript variant 1, mRNA [NM_182964]                                                                              |
| 6.01            | <b>NM_014578</b>    | Homo sapiens ras homolog gene family, member D (RHOD), mRNA [NM_014578]                                                                                     |
| 5.99            | <b>NM_018891</b>    | Homo sapiens laminin, gamma 2 (LAMC2), transcript variant 2, mRNA [NM_018891]                                                                               |
| 5.95            | <b>NM_016132</b>    | Homo sapiens myelin expression factor 2 (MYEF2), mRNA [NM_016132]                                                                                           |
| 5.85            | NM_014595           | Homo sapiens 5', 3'-nucleotidase, cytosolic (NT5C), mRNA [NM_014595]                                                                                        |
| 5.83            | <b>NM_002017</b>    | Homo sapiens Friend leukemia virus integration 1 (FLI1), mRNA [NM_002017]                                                                                   |
| 5.78            | <b>NM_001003845</b> | Homo sapiens Sp5 transcription factor (SP5), mRNA [NM_001003845]                                                                                            |
| 5.68            | NM_003914           | Homo sapiens cyclin A1 (CCNA1), mRNA [NM_003914]                                                                                                            |
| 5.64            | NM_001511           | Homo sapiens chemokine (C-X-C motif) ligand 1 (melanoma growth stimulating activity, alpha) (CXCL1), mRNA [NM_001511]                                       |
| 5.63            | <b>NM_020152</b>    | Homo sapiens chromosome 21 open reading frame 7 (C21orf7), mRNA [NM_020152]                                                                                 |
| 5.58            | NM_017664           | Homo sapiens ankyrin repeat domain 10 (ANKRD10), mRNA [NM_017664]                                                                                           |
| 5.57            | NM_006410           | Homo sapiens HIV-1 Tat interactive protein 2, 30kDa (HTATIP2), mRNA [NM_006410]                                                                             |
| 5.53            | NM_006890           | Homo sapiens carcinoembryonic antigen-related cell adhesion molecule 7 (CEACAM7), mRNA [NM_006890]                                                          |
| 5.52            | NM_002113           | Homo sapiens complement factor H-related 1 (CFHL1), mRNA [NM_002113]                                                                                        |

5.46 **NM\_019043** Homo sapiens amyloid beta (A4) precursor protein-binding, family B, member 1 interacting protein (APBB1IP), mRNA [NM\_019043]  
5.42 **NM\_000186** Homo sapiens complement factor H (CFH), transcript variant 1, mRNA [NM\_000186]  
5.35 **NM\_004591** Homo sapiens chemokine (C-C motif) ligand 20 (CCL20), mRNA [NM\_004591]  
5.32 **NM\_213633** Homo sapiens pregnancy specific beta-1-glycoprotein 4 (PSG4), transcript variant 2, mRNA [NM\_213633]  
5.29 **NM\_000024** Homo sapiens adrenergic, beta-2-, receptor, surface (ADRB2), mRNA [NM\_000024]  
5.24 **NM\_002655** Homo sapiens pleiomorphic adenoma gene 1 (PLAG1), mRNA [NM\_002655]  
5.22 **NM\_000782** Homo sapiens cytochrome P450, family 24, subfamily A, polypeptide 1 (CYP24A1), nuclear gene encoding mitochondrial protein, mRNA [NM\_000782]  
5.21 **NM\_182977** Homo sapiens nicotinamide nucleotide transhydrogenase (NNT), mRNA [NM\_182977]  
5.17 **NM\_002343** Homo sapiens lactotransferrin (LTF), mRNA [NM\_002343]  
5.15 **NM\_001002924** Homo sapiens adaptor-related protein complex 3, sigma 1 subunit (AP3S1), transcript variant 2, mRNA [NM\_001002924]  
5.09 **NM\_004746** Homo sapiens discs, large (Drosophila) homolog-associated protein 1 (DLGAP1), transcript variant alpha, mRNA [NM\_004746]  
5.04 **NM\_002526** Homo sapiens 5'-nucleotidase, ecto (CD73) (NT5E), mRNA [NM\_002526]  
4.82 **NM\_033266** Homo sapiens protein phosphatase 1, regulatory (inhibitor) subunit 14A (PPP1R14A), mRNA [NM\_033266]  
4.77 **NM\_007021** Homo sapiens chromosome 10 open reading frame 10 (C10orf10), mRNA [NM\_007021]  
4.75 **NM\_004621** Homo sapiens transient receptor potential cation channel, subfamily C, member 6 (TRPC6), mRNA [NM\_004621]  
4.69 **NM\_004210** Homo sapiens neuralized-like (Drosophila) (NEURL), mRNA [NM\_004210]  
4.69 **NM\_033260** Homo sapiens forkhead box Q1 (FOXQ1), mRNA [NM\_033260]  
4.68 **NM\_001001188** Homo sapiens transient receptor potential cation channel, subfamily M, member 2 (TRPM2), transcript variant S, mRNA [NM\_001001188]  
4.60 **NM\_000067** Homo sapiens carbonic anhydrase II (CA2), mRNA [NM\_000067]  
4.58 **NM\_007150** Homo sapiens zinc finger protein 185 (LIM domain) (ZNF185), mRNA [NM\_007150]  
4.55 **NM\_152365** Homo sapiens chromosome 1 open reading frame 172 (C1orf172), mRNA [NM\_152365]  
4.54 **NM\_001015880** Homo sapiens 3'-phosphoadenosine 5'-phosphosulfate synthase 2 (PAPSS2), transcript variant 2, mRNA [NM\_001015880]  
4.53 **NM\_000165** Homo sapiens gap junction protein, alpha 1, 43kDa (connexin 43) (GJA1), mRNA [NM\_000165]  
4.52 **NM\_000676** Homo sapiens adenosine A2b receptor (ADORA2B), mRNA [NM\_000676]  
4.39 **NM\_198404** Homo sapiens potassium channel tetramerisation domain containing 4 (KCTD4), mRNA [NM\_198404]  
4.38 **NM\_000361** Homo sapiens thrombomodulin (THBD), mRNA [NM\_000361]  
4.38 **NM\_032192** Homo sapiens protein phosphatase 1, regulatory (inhibitor) subunit 1B (dopamine and cAMP regulated phosphoprotein, DARPP-32) (PPP1R1B), transcript variant 1, mRNA [NM\_032192]  
4.36 **NM\_000092** Homo sapiens collagen, type IV, alpha 4 (COL4A4), mRNA [NM\_000092]  
4.35 **NM\_004482** Homo sapiens UDP-N-acetyl-alpha-D-galactosamine:polypeptide N-acetylglucosaminyltransferase 3 (GalNAc-T3) (GALNT3), mRNA [NM\_004482]  
4.31 **NM\_003264** Homo sapiens toll-like receptor 2 (TLR2), mRNA [NM\_003264]  
4.29 **NM\_005397** Homo sapiens podocalyxin-like (PODXL), transcript variant 2, mRNA [NM\_005397]  
4.24 **NM\_006287** Homo sapiens tissue factor pathway inhibitor (lipoprotein-associated coagulation inhibitor) (TFPI), mRNA [NM\_006287]  
4.24 **NM\_031934** Homo sapiens RAB34, member RAS oncogene family (RAB34), mRNA [NM\_031934]  
4.21 **NM\_004138** Homo sapiens keratin, hair, acidic, 3A (KRTHA3A), mRNA [NM\_004138]  
4.18 **NM\_002065** Homo sapiens glutamate-ammonia ligase (glutamine synthase) (GLUL), mRNA [NM\_002065]  
4.16 **NM\_004417** Homo sapiens dual specificity phosphatase 1 (DUSP1), mRNA [NM\_004417]  
4.13 **NM\_002783** Homo sapiens pregnancy specific beta-1-glycoprotein 7 (PSG7), mRNA [NM\_002783]  
4.00 **NM\_031484** Homo sapiens MARVEL domain containing 1 (MARVELD1), mRNA [NM\_031484]  
3.98 **NM\_005410** Homo sapiens selenoprotein P, plasma, 1 (SEPP1), mRNA [NM\_005410]  
3.96 **NM\_080736** Homo sapiens WAP four-disulfide core domain 2 (WFDc2), transcript variant 2, mRNA [NM\_080736]  
3.96 **NM\_001218** Homo sapiens carbonic anhydrase XII (CA12), transcript variant 1, mRNA [NM\_001218]  
3.95 **NM\_002174** Homo sapiens cytidine monophosphate-N-acetylneuraminic acid hydroxylase (CMP-N-acetylneuraminic acid hydroxylase) (CMAH) on chromosome 6 [NR\_002174]  
3.94 **NM\_002194** Homo sapiens inositol polyphosphate-1-phosphatase (INPP1), mRNA [NM\_002194]  
3.94 **NM\_024769** Homo sapiens adipocyte-specific adhesion molecule (ASAM), mRNA [NM\_024769]  
3.93 **NM\_006547** Homo sapiens IGF-II mRNA-binding protein 3 (IMP-3), mRNA [NM\_006547]  
3.92 **NM\_005531** Homo sapiens interferon, gamma-inducible protein 16 (IFI16), mRNA [NM\_005531]  
3.85 **NM\_001924** Homo sapiens growth arrest and DNA-damage-inducible, alpha (GADD45A), mRNA [NM\_001924]  
3.84 **NM\_000873** Homo sapiens intercellular adhesion molecule 2 (ICAM2), mRNA [NM\_000873]  
3.83 **NM\_004934** Homo sapiens cadherin 18, type 2 (CDH18), mRNA [NM\_004934]  
3.83 **NM\_016315** Homo sapiens GULP, engulfment adaptor PTB domain containing 1 (GULP1), mRNA [NM\_016315]  
3.83 **NM\_173576** Homo sapiens chromosome 10 open reading frame 48 (C10orf48), mRNA [NM\_173576]  
3.81 **NM\_032797** Homo sapiens apoptosis-inducing factor (AIF)-like mitochondrion-associated inducer of death (AMID), mRNA [NM\_032797]  
3.77 **NM\_000211** Homo sapiens integrin, beta 2 (antigen CD18 (p95), lymphocyte function-associated antigen 1; macrophage antigen 1 (mac-1) beta subunit) (ITGB2), mRNA [NM\_000211]  
3.76 **NM\_152680** Homo sapiens hypothetical protein FLJ32028 (FLJ32028), mRNA [NM\_152680]  
3.76 **NM\_006322** Homo sapiens tubulin, gamma complex associated protein 3 (TUBGCP3), mRNA [NM\_006322]  
3.75 **NM\_001874** Homo sapiens carboxypeptidase M (CPM), transcript variant 1, mRNA [NM\_001874]  
3.73 **NM\_020386** Homo sapiens HRAS-like suppressor (HRASLS), mRNA [NM\_020386]  
3.71 **NM\_007250** Homo sapiens Kruppel-like factor 8 (KLF8), mRNA [NM\_007250]  
3.71 **NM\_182494** Homo sapiens family with sequence similarity 26, member A (FAM26A), mRNA [NM\_182494]  
3.69 **NM\_025047** Homo sapiens ADP-ribosylation factor 7 (ARF7), mRNA [NM\_025047]  
3.64 **NM\_005257** Homo sapiens GATA binding protein 6 (GATA6), mRNA [NM\_005257]  
3.63 **NM\_001323** Homo sapiens cystatin E/M (CST6), mRNA [NM\_001323]  
3.63 **NM\_032211** Homo sapiens lysyl oxidase-like 4 (LOXL4), mRNA [NM\_032211]  
3.63 **NM\_144668** Homo sapiens WD repeat domain 66 (WDR66), mRNA [NM\_144668]  
3.62 **NM\_006834** Homo sapiens RAB32, member RAS oncogene family (RAB32), mRNA [NM\_006834]  
3.62 **NM\_025214** Homo sapiens CTCL tumor antigen se57-1 (SE57-1), mRNA [NM\_025214]  
3.61 **NM\_003115** Homo sapiens UDP-N-acetylglucosamine pyrophosphorylase 1 (UAP1), mRNA [NM\_003115]  
3.60 **NM\_000916** Homo sapiens oxytocin receptor (OXTR), mRNA [NM\_000916]  
3.59 **NM\_032578** Homo sapiens myopalladin (FLJ14437), mRNA [NM\_032578]  
3.59 **NM\_001086** Homo sapiens arylacetamide deacetylase (esterase) (AADAC), mRNA [NM\_001086]  
3.57 **NM\_004293** Homo sapiens guanine deaminase (GDA), mRNA [NM\_004293]  
3.57 **NM\_005814** Homo sapiens glycoprotein A33 (transmembrane) (GPA33), mRNA [NM\_005814]  
3.56 **NM\_006000** Homo sapiens tubulin, alpha 1 (testis specific) (TUBA1), mRNA [NM\_006000]  
3.54 **NM\_002006** Homo sapiens fibroblast growth factor 2 (basic) (FGF2), mRNA [NM\_002006]  
3.54 **NM\_004181** Homo sapiens ubiquitin carboxyl-terminal esterase L1 (ubiquitin thiolesterase) (UCHL1), mRNA [NM\_004181]  
3.54 **NM\_001004019** Homo sapiens fibulin 2 (FBLN2), transcript variant 1, mRNA [NM\_001004019]  
3.52 **NM\_014344** Homo sapiens four jointed box 1 (Drosophila) (FJX1), mRNA [NM\_014344]  
3.50 **NM\_138801** Homo sapiens galactose mutarotase (aldose 1-epimerase) (GALM), mRNA [NM\_138801]  
3.50 **NM\_003714** Homo sapiens stanniocalcin 2 (STC2), mRNA [NM\_003714]  
3.47 **NM\_017779** Homo sapiens DEP domain containing 1 (DEPDC1), mRNA [NM\_017779]  
3.46 **NM\_002090** Homo sapiens chemokine (C-X-C motif) ligand 3 (CXCL3), mRNA [NM\_002090]  
3.43 **NM\_017878** Homo sapiens HRAS-like suppressor 2 (HRASLS2), mRNA [NM\_017878]

3.43 **NM\_006159** Homo sapiens NEL-like 2 (chicken) (NELL2), mRNA [NM\_006159]  
3.41 **NM\_032405** Homo sapiens transmembrane protease, serine 3 (TMPRSS3), transcript variant D, mRNA [NM\_032405]  
3.40 **NM\_144682** Homo sapiens hypothetical protein FLJ31952 (FLJ31952), mRNA [NM\_144682]  
3.40 **NM\_153840** Homo sapiens G protein-coupled receptor 110 (GPR110), transcript variant 1, mRNA [NM\_153840]  
3.38 **NM\_005059** Homo sapiens relaxin 2 (RLN2), transcript variant 2, mRNA [NM\_005059]  
3.37 **NM\_005504** Homo sapiens branched chain aminotransferase 1, cytosolic (BCAT1), mRNA [NM\_005504]  
3.35 **NM\_003480** Homo sapiens microfibrillar associated protein 5 (MFAP5), mRNA [NM\_003480]  
3.32 **NM\_022550** Homo sapiens X-ray repair complementing defective repair in Chinese hamster cells 4 (XRCC4), transcript variant 3, mRNA [NM\_022550]  
3.32 **NM\_024901** Homo sapiens hypothetical protein FLJ22457 (FLJ22457), mRNA [NM\_024901]  
3.30 **NM\_004235** Homo sapiens Kruppel-like factor 4 (gut) (KLF4), mRNA [NM\_004235]  
3.28 **NM\_134470** Homo sapiens interleukin 1 receptor accessory protein (IL1RAP), transcript variant 2, mRNA [NM\_134470]  
3.27 **NM\_153256** Homo sapiens chromosome 10 open reading frame 47 (C10orf47), mRNA [NM\_153256]  
3.27 **NM\_152782** Homo sapiens Sad1 and UNC84 domain containing 1 (SUNC1), mRNA [NM\_152782]  
3.26 **NM\_030955** Homo sapiens a disintegrin-like and metalloprotease (repolyrin type) with thrombospondin type 1 motif, 12 (ADAMTS12), mRNA [NM\_030955]  
3.25 **NM\_001004313** Homo sapiens similar to RIKEN cDNA A73005C05 gene (LOC388335), mRNA [NM\_001004313]  
3.23 **NM\_194319** Homo sapiens zinc finger protein 542 (ZNF542), mRNA [NM\_194319]  
3.22 **NM\_016357** Homo sapiens epithelial protein lost in neoplasm beta (EPLIN), mRNA [NM\_016357]  
3.21 **NM\_025019** Homo sapiens tubulin, alpha 4 (TUBA4), mRNA [NM\_025019]  
3.20 **NM\_003979** Homo sapiens G protein-coupled receptor, family C, group 5, member A (GPCRC5A), mRNA [NM\_003979]  
3.18 **NM\_001773** Homo sapiens CD34 antigen (CD34), mRNA [NM\_001773]  
3.17 **NM\_016144** Homo sapiens COMM domain containing 10 (COMMD10), mRNA [NM\_016144]  
3.15 **NM\_002547** Homo sapiens oligophrenin 1 (OPHN1), mRNA [NM\_002547]  
3.15 **NM\_000610** Homo sapiens CD44 antigen (homing function and Indian blood group system) (CD44), transcript variant 1, mRNA [NM\_000610]  
3.15 **NM\_001423** Homo sapiens epithelial membrane protein 1 (EMP1), mRNA [NM\_001423]  
3.14 **NM\_002961** Homo sapiens S100 calcium binding protein A4 (calcium protein, calvasculin, metastasin, murine placental homolog) (S100A4), transcript variant 1, mRNA [NM\_002961]  
3.12 **NM\_013453** Homo sapiens sperm protein associated with the nucleus, X-linked, family member A1 (SPANXA1), mRNA [NM\_013453]  
3.12 **NM\_018685** Homo sapiens anillin, actin binding protein (scraps homolog, Drosophila) (ANLN), mRNA [NM\_018685]  
3.11 **NM\_031453** Homo sapiens chromosome 10 open reading frame 45 (C10orf45), mRNA [NM\_031453]  
3.11 **NM\_178936** Homo sapiens similar to CG12314 gene product (LOC2011164), mRNA [NM\_178936]  
3.10 **NM\_207352** Homo sapiens cytochrome P450, family 4, subfamily V, polypeptide 2 (CYP4V2), mRNA [NM\_207352]  
3.09 **NM\_024593** Homo sapiens EF-hand calcium binding domain 1 (EFCAB1), mRNA [NM\_024593]  
3.09 **NM\_178496** Homo sapiens similar to BcDNA:GH11415 gene product (LOC151963), mRNA [NM\_178496]  
3.08 **NM\_022154** Homo sapiens solute carrier family 39 (zinc transporter), member 8 (SLC39A8), mRNA [NM\_022154]  
3.08 **NM\_017631** Homo sapiens hypothetical protein FLJ20035 (FLJ20035), mRNA [NM\_017631]  
3.07 **NM\_032417** Homo sapiens SPANX family, member D (SPANXD), mRNA [NM\_032417]  
3.06 **NM\_181597** Homo sapiens uridine phosphorylase 1 (UPP1), transcript variant 2, mRNA [NM\_181597]  
3.05 **NM\_018348** Homo sapiens hypothetical protein FLJ11171 (FLJ11171), mRNA [NM\_018348]  
3.05 **NM\_032714** Homo sapiens chromosome 14 open reading frame 151 (C14orf151), mRNA [NM\_032714]  
3.05 **NM\_024116** Homo sapiens hypothetical protein MGC5306 (MGC5306), mRNA [NM\_024116]  
3.04 **NM\_004464** Homo sapiens fibroblast growth factor 5 (FGF5), transcript variant 1, mRNA [NM\_004464]  
3.04 **NM\_025216** Homo sapiens wingless-type MMTV integration site family, member 10A (WNT10A), mRNA [NM\_025216]  
3.01 **NM\_002192** Homo sapiens inhibitor, beta A (activin A, activin AB alpha polypeptide) (INHBA), mRNA [NM\_002192]  
3.01 **NM\_006579** Homo sapiens emonin binding protein (sterol isomerase) (EBP), mRNA [NM\_006579]  
3.00 **NM\_145654** Homo sapiens RAD52 homolog B (S. cerevisiae) (RAD52B), mRNA [NM\_145654]  
3.00 **NM\_030666** Homo sapiens serine (or cysteine) proteinase inhibitor, clade B (ovalbumin), member 1 (SERPINB1), mRNA [NM\_030666]  
2.99 **NM\_032930** Homo sapiens hypothetical protein MGC13040 (MGC13040), mRNA [NM\_032930]  
2.98 **NM\_197941** Homo sapiens a disintegrin-like and metalloprotease (repolyrin type) with thrombospondin type 1 motif, 6 (ADAMTS6), mRNA [NM\_197941]  
2.98 **NM\_018196** Homo sapiens trimethyllysine hydroxylase, epsilon (TMLHE), mRNA [NM\_018196]  
2.97 **NM\_017585** Homo sapiens solute carrier family 2 (facilitated glucose transporter), member 6 (SLC2A6), mRNA [NM\_017585]  
2.96 **NM\_021023** Homo sapiens complement factor H-related 3 (CFHL3), mRNA [NM\_021023]  
2.95 **NM\_017826** Homo sapiens hypothetical protein FLJ20449 (FLJ20449), mRNA [NM\_017826]  
2.94 **NM\_002402** Homo sapiens mesoderm specific transcript homolog (mouse) (MEST), transcript variant 1, mRNA [NM\_002402]  
2.94 **NM\_005318** Homo sapiens H1 histone family, member 0 (H1F0), mRNA [NM\_005318]  
2.93 **NM\_001657** Homo sapiens amphiregulin (schwannoma-derived growth factor) (AREG), mRNA [NM\_001657]  
2.92 **NM\_021732** Homo sapiens arginine vasopressin-induced 1 (AVP1), mRNA [NM\_021732]  
2.91 **NM\_001014975** Homo sapiens complement factor H (CFH), transcript variant 2, mRNA [NM\_001014975]  
2.90 **NM\_003881** Homo sapiens WNT1 inducible signaling pathway protein 2 (WISP2), mRNA [NM\_003881]  
2.90 **NM\_016545** Homo sapiens immediate early response 5 (IER5), mRNA [NM\_016545]  
2.89 **NM\_203330** Homo sapiens CD59 antigen p18-20 (antigen identified by monoclonal antibodies 16.3A5, E.J16, E.J30, EL32 and G344) (CD59), transcript variant 1, mRNA [NM\_203330]  
2.88 **NM\_003866** Homo sapiens inositol polyphosphate-4-phosphatase, type II, 105kDa (INPP4B), mRNA [NM\_003866]  
2.87 **NM\_005020** Homo sapiens phosphodiesterase 1C, calmodulin-dependent 70kDa (PDE1C), mRNA [NM\_005020]  
2.87 **NM\_006681** Homo sapiens neuromedin U (NMU), mRNA [NM\_006681]  
2.86 **NM\_199242** Homo sapiens unc-13 homolog D (C. elegans) (UNC13D), mRNA [NM\_199242]  
2.86 **NM\_018340** Homo sapiens hypothetical protein FLJ11151 (FLJ11151), mRNA [NM\_018340]  
2.85 **NM\_013452** Homo sapiens variable charge, X-linked (VCX), mRNA [NM\_013452]  
2.84 **NM\_031246** Homo sapiens pregnancy specific beta-1-glycoprotein 2 (PSG2), mRNA [NM\_031246]  
2.84 **NM\_152331** Homo sapiens peroxisomal acyl-CoA thioesterase 2B (PTE2B), mRNA [NM\_152331]  
2.82 **NM\_005239** Homo sapiens v-ets erythroblastosis virus E26 oncogene homolog 2 (avian) (ETS2), mRNA [NM\_005239]  
2.82 **NM\_182909** Homo sapiens downregulated in ovarian cancer 1 (DOC1), transcript variant 1, mRNA [NM\_182909]  
2.81 **NM\_178154** Homo sapiens fucosyltransferase 8 (alpha (1,6) fucosyltransferase) (FUT8), transcript variant 2, mRNA [NM\_178154]  
2.81 **NM\_000527** Homo sapiens low density lipoprotein receptor (familial hypercholesterolemia) (LDLR), mRNA [NM\_000527]  
2.80 **NM\_015205** Homo sapiens ATPase, Class VI, type 11A (ATP11A), transcript variant 1, mRNA [NM\_015205]  
2.80 **NM\_152644** Homo sapiens family with sequence similarity 24, member B (FAM24B), mRNA [NM\_152644]  
2.78 **NM\_014452** Homo sapiens tumor necrosis factor receptor superfamily, member 21 (TNFRSF21), mRNA [NM\_014452]  
2.78 **NM\_206855** Homo sapiens quaking homolog, KH domain RNA binding (mouse) (QKI), transcript variant 4, mRNA [NM\_206855]  
2.78 **NM\_007173** Homo sapiens protease, serine, 23 (PRSS23), mRNA [NM\_007173]  
2.77 **NM\_145715** Homo sapiens tigger transposable element derived 2 (TIGD2), mRNA [NM\_145715]  
2.76 **NM\_022071** Homo sapiens SH2 domain containing 4A (SH2D4A), mRNA [NM\_022071]  
2.75 **NM\_002770** Homo sapiens protease, serine, 2 (trypsin 2) (PRSS2), transcript variant 1, mRNA [NM\_002770]  
2.75 **NM\_016235** Homo sapiens G protein-coupled receptor, family C, group 5, member B (GPCRC5B), mRNA [NM\_016235]  
2.75 **NM\_012413** Homo sapiens glutamyl-peptide cyclotransferase (glutamyl cyclase) (QPCT), mRNA [NM\_012413]  
2.74 **NM\_021101** Homo sapiens claudin 1 (CLDN1), mRNA [NM\_021101]

2.72 **NM\_001920** Homo sapiens decorin (DCN), transcript variant A1, mRNA [NM\_001920]  
2.72 **NM\_018318** Homo sapiens GGA binding partner (FLJ11088), mRNA [NM\_018318]  
2.71 **NM\_001785** Homo sapiens cytidine deaminase (CDA), mRNA [NM\_001785]  
2.71 **NM\_138788** Homo sapiens transmembrane protein 45B (TMEM45B), mRNA [NM\_138788]  
2.70 **NM\_016206** Homo sapiens vestigial-like 3 (VGL-3), mRNA [NM\_016206]  
2.70 **NM\_178177** Homo sapiens nicotinamide nucleotide adenyltransferase 3 (NMNAT3), mRNA [NM\_178177]  
2.70 **NM\_002837** Homo sapiens protein tyrosine phosphatase, receptor type, B (PTPRB), mRNA [NM\_002837]  
2.70 **NM\_145060** Homo sapiens chromosome 18 open reading frame 24 (C18orf24), mRNA [NM\_145060]  
2.68 **NM\_003897** Homo sapiens immediate early response 3 (IER3), transcript variant short, mRNA [NM\_003897]  
2.67 **NM\_020127** Homo sapiens tuftelin 1 (TUFT1), mRNA [NM\_020127]  
2.66 **NM\_198041** Homo sapiens nudix (nucleoside diphosphate linked moiety X)-type motif 6 (NUDT6), transcript variant 2, mRNA [NM\_198041]  
2.66 **NM\_000574** Homo sapiens decay accelerating factor for complement (CD55, Cromer blood group system) (DAF), mRNA [NM\_000574]  
2.65 **NM\_000043** Homo sapiens Fas (TNF receptor superfamily, member 6) (FAS), transcript variant 1, mRNA [NM\_000043]  
2.64 **NM\_014840** Homo sapiens NUAK family, SNF1-like kinase, 1 (NUAK1), mRNA [NM\_014840]  
2.64 **NM\_018284** Homo sapiens quanylate binding protein 3 (GBP3), mRNA [NM\_018284]  
2.64 **NM\_001409** Homo sapiens EGF-like-domain, multiple 3 (EGFL3), mRNA [NM\_001409]  
2.63 **NM\_024924** Homo sapiens hypothetical protein FLJ12985 (FLJ12985), mRNA [NM\_024924]  
2.63 **NM\_003238** Homo sapiens transforming growth factor, beta 2 (TGFB2), mRNA [NM\_003238]  
2.63 **NM\_014899** Homo sapiens Rho-related BTB domain containing 3 (RHOBTB3), mRNA [NM\_014899]  
2.61 **NM\_144717** Homo sapiens fibronectin type III domain containing 6 (FNDC6), mRNA [NM\_144717]  
2.59 **NM\_005258** Homo sapiens GTP cyclohydrolase I feedback regulator (GCHFR), mRNA [NM\_005258]  
2.58 **NM\_177953** Homo sapiens dynein, cytoplasmic, light polypeptide 2A (DNCL2A), transcript variant 2, mRNA [NM\_177953]  
2.58 **NM\_003998** Homo sapiens nuclear factor of kappa light polypeptide gene enhancer in B-cells 1 (p105) (NFKB1), mRNA [NM\_003998]  
2.57 **NM\_145323** Homo sapiens oxysterol binding protein-like 3 (OSBPL3), transcript variant 5, mRNA [NM\_145323]  
2.56 **NM\_015039** Homo sapiens nicotinamide nucleotide adenyltransferase 2 (NMNAT2), transcript variant 1, mRNA [NM\_015039]  
2.56 **NM\_144890** Homo sapiens zinc finger protein 582 (ZNF582), mRNA [NM\_144890]  
2.54 **NM\_018269** Homo sapiens membrane-type 1 matrix metalloproteinase cytoplasmic tail binding protein-1 (MTCBP-1), mRNA [NM\_018269]  
2.53 **NM\_000492** Homo sapiens cystic fibrosis transmembrane conductance regulator, ATP-binding cassette (sub-family C, member 7) (CFTR), mRNA [NM\_000492]  
2.53 **NM\_006142** Homo sapiens stratifin (SFN), mRNA [NM\_006142]  
2.53 **NM\_001012507** Homo sapiens chromosome 6 open reading frame 173 (C6orf173), mRNA [NM\_001012507]  
2.52 **NM\_004666** Homo sapiens vanin 1 (VNN1), mRNA [NM\_004666]  
2.52 **NM\_000424** Homo sapiens keratin 5 (epidermolysis bullosa simplex, Dowling-Meara/Kobner/Weber-Cockayne types) (KRT5), mRNA [NM\_000424]  
2.51 **NM\_003649** Homo sapiens D-aspartate oxidase (DDO), transcript variant 1, mRNA [NM\_003649]  
2.50 **NM\_207418** Homo sapiens family with sequence similarity 72, member A (FAM72A), mRNA [NM\_207418]  
2.50 **NM\_030912** Homo sapiens tripartite motif-containing 8 (TRIM8), mRNA [NM\_030912]  
2.47 **NM\_013989** Homo sapiens deiodinase, iodothyronine, type II (DIO2), transcript variant 1, mRNA [NM\_013989]  
2.47 **NM\_000716** Homo sapiens complement component 4 binding protein, beta (C4BPB), transcript variant 1, mRNA [NM\_000716]  
2.47 **NM\_024854** Homo sapiens hypothetical protein FLJ22028 (FLJ22028), mRNA [NM\_024854]  
2.46 **NM\_005402** Homo sapiens v-ral simian leukemia viral oncogene homolog A (ras related) (RALA), mRNA [NM\_005402]  
2.45 **NM\_002960** Homo sapiens S100 calcium binding protein A3 (S100A3), mRNA [NM\_002960]  
2.45 **NM\_001200** Homo sapiens bone morphogenetic protein 2 (BMP2), mRNA [NM\_001200]  
2.44 **NM\_007308** Homo sapiens synuclein, alpha (non A4 component of amyloid precursor) (SNCA), transcript variant NACP112, mRNA [NM\_007308]  
2.43 **NM\_004045** Homo sapiens ATX1 antioxidant 1 homolog (yeast) (ATOX1), mRNA [NM\_004045]  
2.43 **NM\_004556** Homo sapiens nuclear factor of kappa light polypeptide gene enhancer in B-cells inhibitor, epsilon (NFKBIE), mRNA [NM\_004556]  
2.42 **NM\_080473** Homo sapiens GATA binding protein 5 (GATA5), mRNA [NM\_080473]  
2.42 **NM\_206866** Homo sapiens BTB and CNC homology 1, basic leucine zipper transcription factor 1 (BACH1), transcript variant 1, mRNA [NM\_206866]  
2.41 **NM\_015972** Homo sapiens polymerase (RNA) I polypeptide D, 16kDa (POLR1D), mRNA [NM\_015972]  
2.40 **NM\_001124** Homo sapiens adrenomedullin (ADM), mRNA [NM\_001124]  
2.40 **NM\_003653** Homo sapiens COP9 constitutive photomorphogenic homolog subunit 3 (Arabidopsis) (COPS3), mRNA [NM\_003653]  
2.40 **NM\_001827** Homo sapiens CDC28 protein kinase regulatory subunit 2 (CKS2), mRNA [NM\_001827]  
2.40 **NM\_018300** Homo sapiens zinc finger protein 83 (HPF1) (ZNF83), mRNA [NM\_018300]  
2.39 **NM\_004808** Homo sapiens N-myristoyltransferase 2 (NMT2), mRNA [NM\_004808]  
2.39 **NM\_012084** Homo sapiens glutamate dehydrogenase 2 (GLUD2), mRNA [NM\_012084]  
2.38 **NM\_033520** Homo sapiens chromosome 19 open reading frame 33 (C19orf33), mRNA [NM\_033520]  
2.38 **NM\_005738** Homo sapiens ADP-ribosylation factor-like 4 (ARL4), transcript variant 1, mRNA [NM\_005738]  
2.36 **NM\_000930** Homo sapiens plasminogen activator, tissue (PLAT), transcript variant 1, mRNA [NM\_000930]  
2.36 **NM\_005438** Homo sapiens FOS-like antigen 1 (FOSL1), mRNA [NM\_005438]  
2.35 **NM\_173490** Homo sapiens proline-rich protein PRP2 (PRP2), mRNA [NM\_173490]  
2.35 **NM\_007207** Homo sapiens dual specificity phosphatase 10 (DUSP10), transcript variant 1, mRNA [NM\_007207]  
2.35 **NM\_020663** Homo sapiens ras homolog gene family, member J (RHOU), mRNA [NM\_020663]  
2.34 **NM\_006187** Homo sapiens 2'-5'-oligoadenylate synthetase 3, 100kDa (OAS3), mRNA [NM\_006187]  
2.32 **NM\_001003793** Homo sapiens RNA binding motif, single stranded interacting protein (RBM53), transcript variant 1, mRNA [NM\_001003793]  
2.31 **NM\_079836** Homo sapiens tubulin, alpha 2 (TUBA2), transcript variant 2, mRNA [NM\_079836]  
2.27 **NM\_004753** Homo sapiens dehydrogenase/reductase (SDR family) member 3 (DHR53), mRNA [NM\_004753]  
2.27 **NM\_006290** Homo sapiens tumor necrosis factor, alpha-induced protein 3 (TNFAIP3), mRNA [NM\_006290]  
2.27 **NM\_152352** Homo sapiens chromosome 18 open reading frame 19 (C18orf19), mRNA [NM\_152352]  
2.24 **NM\_145305** Homo sapiens similar to solute carrier family 25, member 16 (LOC203427), mRNA [NM\_145305]  
2.24 **NM\_005532** Homo sapiens interferon, alpha-inducible protein 27 (IFI27), transcript variant a, mRNA [NM\_005532]  
2.24 **NM\_145697** Homo sapiens cell division cycle associated 1 (CDCA1), transcript variant 1, mRNA [NM\_145697]  
2.22 **NM\_004362** Homo sapiens calmeglin (CLGN), mRNA [NM\_004362]  
2.20 **NM\_148672** Homo sapiens chemokine (C-C motif) ligand 28 (CCL28), transcript variant 2, mRNA [NM\_148672]  
2.19 **NM\_013341** Homo sapiens GTP-binding protein PTD004 (PTD004), transcript variant 1, mRNA [NM\_013341]  
2.18 **NM\_013381** Homo sapiens thyrotropin-releasing hormone degrading enzyme (TRHDE), mRNA [NM\_013381]  
2.18 **NM\_031966** Homo sapiens cyclin B1 (CCNB1), mRNA [NM\_031966]  
2.17 **NM\_003358** Homo sapiens UDP-glucose ceramide glucosyltransferase (UGCG), mRNA [NM\_003358]  
2.16 **NM\_006661** Homo sapiens phosphodiesterase 10A (PDE10A), mRNA [NM\_006661]  
2.16 **NM\_198433** Homo sapiens serine/threonine kinase 6 (STK6), transcript variant 1, mRNA [NM\_198433]  
2.16 **NM\_181836** Homo sapiens transmembrane emp24 protein transport domain containing 7 (TMED7), mRNA [NM\_181836]  
2.16 **NM\_019556** Homo sapiens motile sperm domain containing 1 (MOSPD1), mRNA [NM\_019556]  
2.16 **NM\_173567** Homo sapiens abhydrolase domain containing 7 (ABHD7), mRNA [NM\_173567]  
2.15 **NM\_001009991** Homo sapiens synaptotagmin-like 3 (SYTL3), mRNA [NM\_001009991]  
2.15 **NM\_006746** Homo sapiens sex comb on midleg-like 1 (Drosophila) (SCML1), mRNA [NM\_006746]

2.13 **NM\_016230** Homo sapiens cytochrome b5 reductase 4 (CYB5R4), mRNA [NM\_016230]  
 2.13 **NM\_170735** Homo sapiens brain-derived neurotrophic factor (BDNF), transcript variant 1, mRNA [NM\_170735]  
 2.11 **NM\_172374** Homo sapiens interleukin 4 induced 1 (IL4I1), transcript variant 2, mRNA [NM\_172374]  
 2.11 **NM\_002199** Homo sapiens interferon regulatory factor 2 (IRF2), mRNA [NM\_002199]  
 2.08 **NM\_001012733** Homo sapiens 1-acylglycerol-3-phosphate O-acyltransferase 4 (lysophosphatidic acid acyltransferase, delta) (AGPAT4), transcript variant 2, mRNA [NM\_001012733]  
 2.06 **NM\_170784** Homo sapiens McKusick-Kaufman syndrome (MKKS), transcript variant 2, mRNA [NM\_170784]  
 2.06 **NM\_004451** Homo sapiens estrogen-related receptor alpha (ESRRA), mRNA [NM\_004451]  
 2.05 **NM\_018946** Homo sapiens N-acetylneuraminic acid synthase (sialic acid synthase) (NANS), mRNA [NM\_018946]  
 2.02 **NM\_021649** Homo sapiens toll-like receptor adaptor molecule 2 (TICAM2), mRNA [NM\_021649]  
 2.01 **NM\_024102** Homo sapiens WD repeat domain 77 (WDR77), mRNA [NM\_024102]

## B. Downregulated genes

Normalized Data Genbank  
 -100.00 **NM\_178349**  
 -61.73 **NM\_133631**  
 -61.73 **NM\_182758**  
 -58.82 **NM\_007361**  
 -49.26 **NM\_000216**  
 -44.84 **NM\_002423**  
 -31.35 **NM\_013982**  
 -29.33 **NM\_025208**  
 -28.01 **NM\_004750**  
 -27.47 **NM\_004772**  
 -23.53 **NM\_024572**  
 -19.88 **NM\_024410**  
 -17.12 **NM\_052882**  
 -16.37 **NM\_033317**  
 -16.21 **NM\_012069**  
 -16.10 **NM\_000597**  
 -15.90 **NM\_018371**  
 -15.77 **NM\_004360**  
 -14.64 **NM\_024721**  
 -14.53 **NM\_015692**  
 -14.45 **NM\_144720**  
 -14.41 **NM\_212482**  
 -14.29 **NM\_031920**  
 -14.20 **NM\_015267**  
 -14.12 **NM\_015236**  
 -13.91 **NM\_000204**  
 -13.48 **NM\_001007279**  
 -13.19 **NM\_002421**  
 -13.11 **NM\_153456**  
 -12.99 **NM\_001633**  
 -12.45 **NM\_001719**  
 -12.00 **NM\_014737**  
 -11.99 **NM\_001002260**  
 -11.95 **NM\_080625**  
 -11.89 **NM\_015669**  
 -11.47 **NM\_021998**  
 -11.39 **NM\_001001996**  
 -11.21 **NM\_021248**  
 -11.19 **NM\_002727**  
 -11.11 **NM\_018712**  
 -11.04 **NM\_194463**  
 -10.55 **NM\_152748**  
 -10.53 **NM\_145348**  
 -10.50 **NM\_000743**  
 -10.40 **NM\_182665**  
 -10.27 **NM\_052947**  
 -10.24 **NM\_014836**  
 -10.17 **NM\_020215**  
 -10.00 **NM\_006113**  
 -10.00 **NM\_016606**  
 -9.80 **NM\_020904**  
 -9.71 **NM\_000690**  
 -9.71 **NM\_004062**  
 -9.43 **NM\_003012**  
 -9.35 **NM\_017565**  
 -9.01 **NM\_000965**  
 -8.85 **NM\_013230**  
 -8.77 **NM\_003645**  
 -8.77 **NM\_014677**  
 -8.77 **NM\_138424**  
 -8.70 **NM\_004633**  
 -8.70 **NM\_015567**  
 -8.55 **NM\_000854**  
 -8.40 **NM\_017993**  
 -8.33 **NM\_002133**  
 -8.26 **NM\_031935**  
 -8.20 **NM\_000962**  
 -8.20 **NM\_001849**  
 -8.20 **NM\_005564**

Description  
 Homo sapiens late cornified envelope 1B (LCE1B), mRNA [NM\_178349]  
 Homo sapiens roundabout, axon guidance receptor, homolog 1 (Drosophila) (ROBO1), transcript variant 2, mRNA [NM\_133631]  
 Homo sapiens WD repeat domain 72 (WDR72), mRNA [NM\_182758]  
 Homo sapiens nidogen 2 (osteonidogen) (NID2), mRNA [NM\_007361]  
 Homo sapiens Kallmann syndrome 1 sequence (KAL1), mRNA [NM\_000216]  
 Homo sapiens matrix metalloproteinase 7 (matrilysin, uterine) (MMP7), mRNA [NM\_002423]  
 Homo sapiens neuregulin 2 (NRG2), transcript variant 3, mRNA [NM\_013982]  
 Homo sapiens platelet derived growth factor D (PDGFD), transcript variant 1, mRNA [NM\_025208]  
 Homo sapiens cytokine receptor-like factor 1 (CRLF1), mRNA [NM\_004750]  
 Homo sapiens chromosome 5 open reading frame 13 (C5orf13), mRNA [NM\_004772]  
 Homo sapiens UDP-N-acetyl-alpha-D-galactosamine:polypeptide N-acetylgalactosaminyltransferase 14 (GalNAc-T14) (GALNT14), mRNA [NM\_024572]  
 Homo sapiens outer dense fiber of sperm tails 1 (ODF1), mRNA [NM\_024410]  
 Homo sapiens zinc finger, imprinted 3 (ZNF3), mRNA [NM\_052882]  
 Homo sapiens dermokin (ZD52F10), mRNA [NM\_033317]  
 Homo sapiens ATPase, (Na+)/K+ transporting, beta 4 polypeptide (ATP1B4), mRNA [NM\_012069]  
 Homo sapiens insulin-like growth factor binding protein 2, 36kDa (IGFBP2), mRNA [NM\_000597]  
 Homo sapiens chondroitin beta1,4 N-acetylgalactosaminyltransferase (ChGn), mRNA [NM\_018371]  
 Homo sapiens cadherin 1, type 1, E-cadherin (epithelial) (CDH1), mRNA [NM\_004360]  
 Homo sapiens zinc finger homeodomain 4 (ZFX4), mRNA [NM\_024721]  
 Homo sapiens C3 and PZP-like, alpha-2-macroglobulin domain containing 8 (CPAMD8), mRNA [NM\_015692]  
 Homo sapiens multiple coiled-coil GABABR1-binding protein (MARLIN1), mRNA [NM\_144720]  
 Homo sapiens fibronectin 1 (FN1), transcript variant 1, mRNA [NM\_212482]  
 Homo sapiens ARG99 protein (ARG99), transcript variant 1, mRNA [NM\_031920]  
 Homo sapiens cut-like 2 (Drosophila) (CUTL2), mRNA [NM\_015267]  
 Homo sapiens latrophilin 3 (LPHN3), mRNA [NM\_015236]  
 Homo sapiens I factor (complement) (IF), mRNA [NM\_000204]  
 Homo sapiens RAS-related on chromosome 22 (RRP22), transcript variant 2, mRNA [NM\_001007279]  
 Homo sapiens matrix metalloproteinase 1 (interstitial collagenase) (MMP1), mRNA [NM\_002421]  
 Homo sapiens heparan sulfate 6-O-sulfotransferase 3 (HSST3), mRNA [NM\_153456]  
 Homo sapiens alpha-1-microglobulin/bikunin precursor (AMB1), mRNA [NM\_001633]  
 Homo sapiens bone morphogenetic protein 7 (osteogenic protein 1) (BMP7), mRNA [NM\_001719]  
 Homo sapiens Ras association (RalGDS/AF-6) domain family 2 (RASSF2), transcript variant 1, mRNA [NM\_014737]  
 Homo sapiens chromosome 9 open reading frame 58 (C9orf58), transcript variant 2, mRNA [NM\_001002260]  
 Homo sapiens chromosome 20 open reading frame 160 (C20orf160), mRNA [NM\_080625]  
 Homo sapiens protocadherin beta 5 (PCDH5), mRNA [NM\_015669]  
 Homo sapiens zinc finger protein 6 (CMPX1) (ZNF6), mRNA [NM\_021998]  
 Homo sapiens glycoprotein M6B (GPM6B), transcript variant 2, mRNA [NM\_001001996]  
 Homo sapiens cadherin-like 22 (CDH22), mRNA [NM\_021248]  
 Homo sapiens proteoglycan 1, secretory granule (PRG1), mRNA [NM\_002727]  
 Homo sapiens ELMO domain containing 1 (ELMOD1), mRNA [NM\_018712]  
 Homo sapiens ring finger protein 128 (RNF128), transcript variant 1, mRNA [NM\_194463]  
 Homo sapiens KIAA1324-like (KIAA1324L), mRNA [NM\_152748]  
 Homo sapiens kringle containing transmembrane protein 2 (KREMEN2), transcript variant 3, mRNA [NM\_145348]  
 Homo sapiens cholinergic receptor, nicotinic, alpha polypeptide 3 (CHRNA3), mRNA [NM\_000743]  
 Homo sapiens Ras association (RalGDS/AF-6) domain family 5 (RASSF5), transcript variant 3, mRNA [NM\_182665]  
 Homo sapiens heart alpha-kinase (HAK), mRNA [NM\_052947]  
 Homo sapiens Rho-related BTB domain containing 1 (RHOBTB1), transcript variant 1, mRNA [NM\_014836]  
 Homo sapiens chromosome 14 open reading frame 132 (C14orf132), mRNA [NM\_020215]  
 Homo sapiens vav 3 oncogene (VAV3), mRNA [NM\_006113]  
 Homo sapiens chromosome 5 open reading frame 19 (C5orf19), mRNA [NM\_016606]  
 Homo sapiens pleckstrin homology domain containing, family A (phosphoinositide binding specific) member 4 (PLEKH4A), mRNA [NM\_020904]  
 Homo sapiens aldehyde dehydrogenase 2 family (mitochondrial) (ALDH2), nuclear gene encoding mitochondrial protein, mRNA [NM\_000690]  
 Homo sapiens cadherin 16, KSP-cadherin (CDH16), mRNA [NM\_004062]  
 Homo sapiens secreted frizzled-related protein 1 (SFRP1), mRNA [NM\_003012]  
 Homo sapiens family with sequence similarity 20, member A (FAM20A), mRNA [NM\_017565]  
 Homo sapiens retinoic acid receptor, beta (RARβ), transcript variant 1, mRNA [NM\_000965]  
 Homo sapiens CD24 antigen (small cell lung carcinoma cluster 4 antigen) (CD24), mRNA [NM\_013230]  
 Homo sapiens solute carrier family 27 (fatty acid transporter), member 2 (SLC27A2), mRNA [NM\_003645]  
 Homo sapiens regulating synaptic membrane exocytosis 2 (RIMS2), mRNA [NM\_014677]  
 Homo sapiens kinesin family member 12 (KIF12), mRNA [NM\_138424]  
 Homo sapiens interleukin 1 receptor, type II (IL1R2), transcript variant 1, mRNA [NM\_004633]  
 Homo sapiens SLIT and NTRK-like family, member 5 (SLITRK5), mRNA [NM\_015567]  
 Homo sapiens glutathione S-transferase theta 2 (GSTT2), mRNA [NM\_000854]  
 Homo sapiens hypothetical protein FLJ10094 (FLJ10094), mRNA [NM\_017993]  
 Homo sapiens heme oxygenase (decycling) 1 (HMOX1), mRNA [NM\_002133]  
 Homo sapiens hemicentin 1 (HMCN1), mRNA [NM\_031935]  
 Homo sapiens prostaglandin-endoperoxide synthase 1 (prostaglandin G/H synthase and cyclooxygenase) (PTGS1), transcript variant 1, mRNA [NM\_000962]  
 Homo sapiens collagen, type VI, alpha 2 (COL6A2), transcript variant 2C2, mRNA [NM\_001849]  
 Homo sapiens lipocalin 2 (oncogene 24p3) (LCN2), mRNA [NM\_005564]

-8.13 NM\_152908 Homo sapiens hypothetical protein FLJ31196 (FLJ31196), mRNA [NM\_152908]  
 -8.13 NM\_153043 Homo sapiens hypothetical protein FLJ37078 (FLJ37078), mRNA [NM\_153043]  
 -7.94 NM\_005574 Homo sapiens LIM domain only 2 (rhombotin-like 1) (LMO2), mRNA [NM\_005574]  
 -7.81 NM\_017752 Homo sapiens FLJ20298 protein (FLJ20298), transcript variant 1, mRNA [NM\_017752]  
 -7.75 NM\_020871 Homo sapiens leucine-rich repeats and calponin homology (CH) domain containing 2 (LRCH2), mRNA [NM\_020871]  
 -7.69 NM\_172113 Homo sapiens eyes absent homolog 2 (Drosophila) (EYA2), transcript variant 2, mRNA [NM\_172113]  
 -7.58 NM\_002968 Homo sapiens sal-like 1 (Drosophila) (SALL1), mRNA [NM\_002968]  
 -7.58 NM\_005269 Homo sapiens glioma-associated oncogene homolog 1 (zinc finger protein) (GLI1), mRNA [NM\_005269]  
 -7.58 NM\_018168 Homo sapiens chromosome 14 open reading frame 105 (C14orf105), mRNA [NM\_018168]  
 -7.46 NM\_002118 Homo sapiens major histocompatibility complex, class II, DM beta (HLA-DMB), mRNA [NM\_002118]  
 -7.41 NM\_019076 Homo sapiens UDP glucuronosyltransferase 1 family, polypeptide A8 (UGT1A8), mRNA [NM\_019076]  
 -7.30 NM\_005822 Homo sapiens Down syndrome critical region gene 1-like 1 (DSCR1L1), mRNA [NM\_005822]  
 -7.25 NM\_005883 Homo sapiens adenomatosis polyposis coli 2 (APC2), mRNA [NM\_005883]  
 -7.19 NM\_174858 Homo sapiens adenylate kinase 5 (AK5), transcript variant 1, mRNA [NM\_174858]  
 -7.14 NM\_153347 Homo sapiens hypothetical protein FLJ90119 (FLJ90119), mRNA [NM\_153347]  
 -6.94 NM\_014832 Homo sapiens TBC1 domain family, member 4 (TBC1D4), mRNA [NM\_014832]  
 -6.94 NM\_021785 Homo sapiens retinoic acid induced 2 (RAI2), mRNA [NM\_021785]  
 -6.90 NM\_001005747 Homo sapiens calcium channel, voltage-dependent, beta 4 subunit (CACNB4), transcript variant 1, mRNA [NM\_001005747]  
 -6.76 NM\_024603 Homo sapiens chromosome 1 open reading frame 165 (C1orf165), mRNA [NM\_024603]  
 -6.71 NM\_000238 Homo sapiens potassium voltage-gated channel, subfamily H (eag-related), member 2 (KCNH2), transcript variant 1, mRNA [NM\_000238]  
 -6.71 NM\_005654 Homo sapiens nuclear receptor subfamily 2, group F, member 1 (NR2F1), mRNA [NM\_005654]  
 -6.71 NM\_014392 Homo sapiens DNA segment on chromosome 4 (unique) 234 expressed sequence (D4S234E), mRNA [NM\_014392]  
 -6.67 NM\_016109 Homo sapiens angiotensin-like 4 (ANGPTL4), transcript variant 2, mRNA [NM\_016109]  
 -6.62 NM\_020987 Homo sapiens ankyrin 3, node of Ranvier (ankyrin G) (ANK3), transcript variant 1, mRNA [NM\_020987]  
 -6.58 NM\_031455 Homo sapiens coiled-coil domain containing 3 (CCDC3), mRNA [NM\_031455]  
 -6.54 NM\_001964 Homo sapiens early growth response 1 (EGR1), mRNA [NM\_001964]  
 -6.54 NM\_004976 Homo sapiens potassium voltage-gated channel, Shaw-related subfamily, member 1 (KCNK1), mRNA [NM\_004976]  
 -6.54 NM\_007257 Homo sapiens paraneoplastic antigen MA2 (PNMA2), mRNA [NM\_007257]  
 -6.37 NM\_032321 Homo sapiens hypothetical protein MGC13057 (MGC13057), mRNA [NM\_032321]  
 -6.33 NM\_201535 Homo sapiens NDRG family member 2 (NDRG2), transcript variant 1, mRNA [NM\_201535]  
 -6.25 NM\_001766 Homo sapiens CD1D antigen, d polypeptide (CD1D), mRNA [NM\_001766]  
 -6.25 NM\_002126 Homo sapiens hepatic leukemia factor (HLF), mRNA [NM\_002126]  
 -6.25 NM\_002166 Homo sapiens inhibitor of DNA binding 2, dominant negative helix-loop-helix protein (ID2), mRNA [NM\_002166]  
 -6.21 NM\_004345 Homo sapiens cathelicidin antimicrobial peptide (CAMP), mRNA [NM\_004345]  
 -6.21 NM\_005264 Homo sapiens GDNF family receptor alpha 1 (GFRA1), transcript variant 1, mRNA [NM\_005264]  
 -6.17 NM\_004843 Homo sapiens interleukin 27 receptor, alpha (IL27RA), mRNA [NM\_004843]  
 -6.17 NM\_147175 Homo sapiens heparan sulfate 6-O-sulfotransferase 2 (HS6ST2), transcript variant S, mRNA [NM\_147175]  
 -6.10 NM\_004004 Homo sapiens gap junction protein, beta 2, 26kDa (connexin 26) (GJB2), mRNA [NM\_004004]  
 -6.10 NM\_014585 Homo sapiens solute carrier family 40 (iron-regulated transporter), member 1 (SLC40A1), mRNA [NM\_014585]  
 -6.02 NM\_001850 Homo sapiens collagen, type VIII, alpha 1 (COL8A1), transcript variant 1, mRNA [NM\_001850]  
 -6.02 NM\_004098 Homo sapiens empty spiracles homolog 2 (Drosophila) (EMX2), mRNA [NM\_004098]  
 -6.02 NM\_014747 Homo sapiens regulating synaptic membrane exocytosis 3 (RIMS3), mRNA [NM\_014747]  
 -6.02 NM\_173562 Homo sapiens phosphomutase 2-like 1 (PGM2L1), mRNA [NM\_173562]  
 -5.99 NM\_021021 Homo sapiens syntrophin, beta 1 (dystrophin-associated protein A1, 59kDa, basic component 1) (SNTB1), mRNA [NM\_021021]  
 -5.95 NM\_175873 Homo sapiens ankyrin repeat domain 43 (ANKRD43), mRNA [NM\_175873]  
 -5.85 NM\_003613 Homo sapiens cartilage intermediate layer protein, nucleotide pyrophosphohydrolase (CILP), mRNA [NM\_003613]  
 -5.85 NM\_020692 Homo sapiens UDP-N-acetyl-alpha-D-galactosamine:polypeptide N-acetylgalactosaminyltransferase-like 1 (GALNTL1), mRNA [NM\_020692]  
 -5.85 NM\_020856 Homo sapiens zinc finger protein 537 (ZNF537), mRNA [NM\_020856]  
 -5.81 NM\_181711 Homo sapiens GRP1 (general receptor for phosphoinositides 1)-associated scaffold protein (GRASP), mRNA [NM\_181711]  
 -5.78 NM\_001013615 Homo sapiens hypothetical LOC541468 protein (LOC541468), mRNA [NM\_001013615]  
 -5.78 NM\_015894 Homo sapiens stathmin-like 3 (STMN3), mRNA [NM\_015894]  
 -5.75 NM\_006873 Homo sapiens stoned B-like factor (SBLF), mRNA [NM\_006873]  
 -5.71 NM\_015678 Homo sapiens neurobeachin (NBEA), mRNA [NM\_015678]  
 -5.68 NM\_001202 Homo sapiens bone morphogenetic protein 4 (BMP4), transcript variant 1, mRNA [NM\_001202]  
 -5.65 NM\_178275 Homo sapiens eEF1A2 binding protein (DKFZp434B1231), mRNA [NM\_178275]  
 -5.62 NM\_053025 Homo sapiens myosin, light polypeptide kinase (MYLK), transcript variant 1, mRNA [NM\_053025]  
 -5.59 NM\_181795 Homo sapiens protein kinase (cAMP-dependent, catalytic) inhibitor beta (PKIB), transcript variant 1, mRNA [NM\_181795]  
 -5.52 NM\_024902 Homo sapiens hypothetical protein FLJ13236 (FLJ13236), mRNA [NM\_024902]  
 -5.52 NM\_178562 Homo sapiens hypothetical protein MGC50844 (MGC50844), mRNA [NM\_178562]  
 -5.49 NM\_138967 Homo sapiens secretory carrier membrane protein 5 (SCAMP5), mRNA [NM\_138967]  
 -5.46 NM\_032872 Homo sapiens synaptotagmin-like 1 (SYTL1), mRNA [NM\_032872]  
 -5.43 NM\_018245 Homo sapiens oxoglutarate dehydrogenase-like (OGDHL), mRNA [NM\_018245]  
 -5.43 NM\_020742 Homo sapiens neuroligin 4, X-linked (NLGN4X), transcript variant 1, mRNA [NM\_020742]  
 -5.43 S70348 Homo sapiens integrin beta 3 mRNA, partial cds, alternatively spliced. [S70348]  
 -5.41 NM\_001005505 Homo sapiens calcium channel, voltage-dependent, alpha 2/delta subunit 2 (CACNA2D2), transcript variant 1, mRNA [NM\_001005505]  
 -5.41 NM\_177978 Homo sapiens chordin (CHRD), transcript variant 2, mRNA [NM\_177978]  
 -5.38 NM\_207303 Homo sapiens attractin-like 1 (ATRNL1), mRNA [NM\_207303]  
 -5.32 NM\_001718 Homo sapiens bone morphogenetic protein 6 (BMP6), mRNA [NM\_001718]  
 -5.32 NM\_014751 Homo sapiens metastasis suppressor 1 (MTSS1), mRNA [NM\_014751]  
 -5.29 NM\_002386 Homo sapiens melanocortin 1 receptor (alpha melanocyte stimulating hormone receptor) (MC1R), mRNA [NM\_002386]  
 -5.26 NM\_015059 Homo sapiens talin 2 (TLN2), mRNA [NM\_015059]  
 -5.24 M31213 Human papillary thyroid carcinoma-encoded protein mRNA, complete cds. [M31213]  
 -5.24 NM\_003078 Homo sapiens SWI/SNF related, matrix associated, actin dependent regulator of chromatin, subfamily d, member 3 (SMARCD3), transcript variant 2, mRNA [NM\_003078]  
 -5.21 NM\_148957 Homo sapiens tumor necrosis factor receptor superfamily, member 19 (TNFRSF19), transcript variant 2, mRNA [NM\_148957]  
 -5.18 NM\_080792 Homo sapiens protein tyrosine phosphatase, non-receptor type substrate 1 (PTPNS1), mRNA [NM\_080792]  
 -5.15 M19308 Human slow skeletal muscle troponin T mRNA, clone M1. [M19308]  
 -5.15 NM\_003392 Homo sapiens wingless-type MMTV integration site family, member 5A (WNT5A), mRNA [NM\_003392]  
 -5.15 NM\_004370 Homo sapiens collagen, type XII, alpha 1 (COL12A1), transcript variant long, mRNA [NM\_004370]  
 -5.13 NM\_003806 Homo sapiens harakiri, BCL2 interacting protein (contains only BH3 domain) (HRK), mRNA [NM\_003806]  
 -5.03 NM\_003719 Homo sapiens phosphodiesterase 8B (PDE8B), transcript variant 1, mRNA [NM\_003719]  
 -5.00 NM\_004932 Homo sapiens cadherin 6, type 2, K-cadherin (fetal kidney) (CDH6), mRNA [NM\_004932]  
 -5.00 NM\_198391 Homo sapiens fibronectin leucine rich transmembrane protein 3 (FLRT3), transcript variant 2, mRNA [NM\_198391]



-4.98 **NM\_003629** Homo sapiens phosphoinositide-3-kinase, regulatory subunit 3 (p55, gamma) (PIK3R3), mRNA [NM\_003629]  
-4.98 **NM\_005876** Homo sapiens aortic preferentially expressed gene 1 (APEG1), mRNA [NM\_005876]  
-4.95 **NM\_000212** Homo sapiens integrin, beta 3 (platelet glycoprotein IIIa, antigen CD61) (ITGB3), mRNA [NM\_000212]  
-4.95 **NM\_004416** Homo sapiens deltex homolog 1 (Drosophila) (DTX1), mRNA [NM\_004416]  
-4.95 **NM\_015381** Homo sapiens family with sequence similarity 19 (chemokine (C-C motif)-like), member A5 (FAM19A5), mRNA [NM\_015381]  
-4.93 **NM\_002867** Homo sapiens RAB3B, member RAS oncogene family (RAB3B), mRNA [NM\_002867]  
-4.93 **NM\_014368** Homo sapiens LIM homeobox 6 (LHX6), transcript variant 1, mRNA [NM\_014368]  
-4.90 **NM\_001645** Homo sapiens apolipoprotein C-1 (APOC1), mRNA [NM\_001645]  
-4.90 **NM\_198686** Homo sapiens RAB15, member RAS oncogene family (RAB15), mRNA [NM\_198686]  
-4.88 **NM\_002252** Homo sapiens potassium voltage-gated channel, delayed-rectifier, subfamily S, member 3 (KCNK3), mRNA [NM\_002252]  
-4.88 **NM\_032532** Homo sapiens fibronectin type III domain containing 1 (FNDC1), mRNA [NM\_032532]  
-4.88 **NM\_033400** Homo sapiens zinc finger homeobox 2 (ZFH2), mRNA [NM\_033400]  
-4.88 **NM\_201575** Homo sapiens seizure related 6 homolog (mouse)-like 2 (SEZL2), transcript variant 2, mRNA [NM\_201575]  
-4.83 **NM\_004010** Homo sapiens dystrophin (muscular dystrophy, Duchenne and Becker types) (DMD), transcript variant Dp427p2, mRNA [NM\_004010]  
-4.83 **NM\_206943** Homo sapiens latent transforming growth factor beta binding protein 1 (LTBP1), transcript variant 1, mRNA [NM\_206943]  
-4.78 **NM\_004561** Homo sapiens ovo-like 1 (Drosophila) (OVOL1), mRNA [NM\_004561]  
-4.78 **NM\_058175** Homo sapiens collagen, type VI, alpha 2 (COL6A2), transcript variant 2C2a', mRNA [NM\_058175]  
-4.76 **NM\_005907** Homo sapiens mannosidase, alpha, class 1A, member 1 (MAN1A1), mRNA [NM\_005907]  
-4.74 **NM\_000363** Homo sapiens troponin I, cardiac (TNNI3), mRNA [NM\_000363]  
-4.74 **NM\_152913** Homo sapiens hypothetical protein DKFzP761L1417 (DKFzP761L1417), mRNA [NM\_152913]  
-4.72 **NM\_021572** Homo sapiens ectonucleotide pyrophosphatase/phosphodiesterase 5 (putative function) (ENPP5), mRNA [NM\_021572]  
-4.72 **NM\_024746** Homo sapiens KIAA1822-like (KIAA1822L), mRNA [NM\_024746]  
-4.69 **NM\_006849** Homo sapiens protein disulfide isomerase family A, member 2 (PDIA2), mRNA [NM\_006849]  
-4.69 **NM\_020039** Homo sapiens amiloride-sensitive cation channel 2, neuronal (ACCN2), transcript variant 1, mRNA [NM\_020039]  
-4.67 **NM\_020836** Homo sapiens likely ortholog of rat brain-enriched guanylate kinase-associated protein (KIAA1446), mRNA [NM\_020836]  
-4.67 **NM\_153756** Homo sapiens fibronectin type III domain containing 5 (FNDC5), mRNA [NM\_153756]  
-4.65 **NM\_000922** Homo sapiens phosphodiesterase 3B, cGMP-inhibited (PDE3B), mRNA [NM\_000922]  
-4.65 **NM\_021615** Homo sapiens carbohydrate (N-acetylglucosamine 6-O) sulfotransferase 6 (CHST6), mRNA [NM\_021615]  
-4.63 **NM\_005407** Homo sapiens sal-like 2 (Drosophila) (SALL2), mRNA [NM\_005407]  
-4.61 **NM\_015526** Homo sapiens CLIP-170-related protein (CLIPR-59), mRNA [NM\_015526]  
-4.59 **NM\_005103** Homo sapiens fasciculation and elongation protein zeta 1 (zygin I) (FEZ1), transcript variant 1, mRNA [NM\_005103]  
-4.55 **NM\_001661** Homo sapiens ADP-ribosylation factor 4-like (ARF4L), mRNA [NM\_001661]  
-4.55 **NM\_024490** Homo sapiens ATPase, Class V, type 10A (ATP10A), mRNA [NM\_024490]  
-4.52 **NM\_001734** Homo sapiens complement component 1, s subcomponent (C1S), transcript variant 1, mRNA [NM\_001734]  
-4.46 **NM\_006744** Homo sapiens retinol binding protein 4, plasma (RBP4), mRNA [NM\_006744]  
-4.44 **NM\_001747** Homo sapiens capping protein (actin filament), gelsolin-like (CAPG), mRNA [NM\_001747]  
-4.44 **NM\_024522** Homo sapiens hypothetical protein FLJ12650 (FLJ12650), mRNA [NM\_024522]  
-4.44 **NM\_025181** Homo sapiens solute carrier family 35, member F5 (SLC35F5), mRNA [NM\_025181]  
-4.42 **NM\_000270** Homo sapiens nucleoside phosphorylase (NP), mRNA [NM\_000270]  
-4.42 **NM\_004843** Homo sapiens interleukin 27 receptor, alpha (IL27RA), mRNA [NM\_004843]  
-4.41 **NM\_004982** Homo sapiens potassium inwardly-rectifying channel, subfamily J, member 8 (KCNJ8), mRNA [NM\_004982]  
-4.41 **NM\_008887** Homo sapiens zinc finger protein 36, C3H type-like 2 (ZFP36L2), mRNA [NM\_008887]  
-4.39 **NM\_000163** Homo sapiens growth hormone receptor (GHR), mRNA [NM\_000163]  
-4.39 **NM\_014867** Homo sapiens KIAA0711 gene product (KIAA0711), mRNA [NM\_014867]  
-4.37 **NM\_012472** Homo sapiens leucine rich repeat containing 6 (LRR6), mRNA [NM\_012472]  
-4.35 **NM\_032536** Homo sapiens netrin G2 (NTNG2), mRNA [NM\_032536]  
-4.33 **NM\_012385** Homo sapiens p8 protein (candidate of metastasis 1) (P8), mRNA [NM\_012385]  
-4.33 **NM\_020801** Homo sapiens arrestin domain containing 3 (ARRDC3), mRNA [NM\_020801]  
-4.33 **NM\_022073** Homo sapiens egl nine homolog 3 (C. elegans) (EGLN3), mRNA [NM\_022073]  
-4.33 **NM\_032808** Homo sapiens leucine rich repeat neuronal 6A (LRRN6A), mRNA [NM\_032808]  
-4.33 **NM\_145056** Homo sapiens thymus expressed gene 3-like (MGC15476), mRNA [NM\_145056]  
-4.31 **NM\_004096** Homo sapiens eukaryotic translation initiation factor 4E binding protein 2 (EIF4EBP2), mRNA [NM\_004096]  
-4.29 **NM\_002247** Homo sapiens potassium large conductance calcium-activated channel, subfamily M, alpha member 1 (KCNMA1), transcript variant 2, mRNA [NM\_002247]  
-4.29 **NM\_003385** Homo sapiens visinin-like 1 (VSNL1), mRNA [NM\_003385]  
-4.29 **NM\_004664** Homo sapiens lin-7 homolog A (C. elegans) (LIN7A), mRNA [NM\_004664]  
-4.27 **NM\_000407** Homo sapiens glycoprotein Ib (platelet), beta polypeptide (GP1BB), mRNA [NM\_000407]  
-4.26 **NM\_016157** Homo sapiens trophinin (TRO), transcript variant 3, mRNA [NM\_016157]  
-4.22 **NM\_014475** Homo sapiens dihydroadiol dehydrogenase (dimeric) (DHDH), mRNA [NM\_014475]  
-4.22 **NM\_054033** Homo sapiens FK506 binding protein 1B, 12.6 kDa (FKBP1B), transcript variant 2, mRNA [NM\_054033]  
-4.20 **NM\_000633** Homo sapiens B-cell CLL/lymphoma 2 (BCL2), nuclear gene encoding mitochondrial protein, transcript variant alpha, mRNA [NM\_000633]  
-4.20 **NM\_178826** Homo sapiens transmembrane protein 16D (TMEM16D), mRNA [NM\_178826]  
-4.18 **NM\_014631** Homo sapiens SH3 multiple domains 1 (SH3MD1), mRNA [NM\_014631]  
-4.18 **NM\_015150** Homo sapiens raft-linking protein (RAFTLIN), mRNA [NM\_015150]  
-4.18 **NM\_173633** Homo sapiens hypothetical protein FLJ90805 (FLJ90805), mRNA [NM\_173633]  
-4.17 **NM\_019058** Homo sapiens DNA-damage-inducible transcript 4 (DDIT4), mRNA [NM\_019058]  
-4.15 **NM\_024786** Homo sapiens zinc finger, DHHC-type containing 11 (ZDHHC11), mRNA [NM\_024786]  
-4.13 **NM\_004490** Homo sapiens growth factor receptor-bound protein 14 (GRB14), mRNA [NM\_004490]  
-4.13 **NM\_004655** Homo sapiens axin 2 (conductin, axil) (AXIN2), mRNA [NM\_004655]  
-4.13 **NM\_006522** Homo sapiens wingless-type MMTV integration site family, member 6 (WNT6), mRNA [NM\_006522]  
-4.13 **NM\_012202** Homo sapiens guanine nucleotide binding protein (G protein), gamma 3 (GNNG3), mRNA [NM\_012202]  
-4.13 **NM\_021020** Homo sapiens leucine zipper, putative tumor suppressor 1 (LZTS1), mRNA [NM\_021020]  
-4.13 **NM\_144595** Homo sapiens hypothetical protein FLJ30046 (FLJ30046), mRNA [NM\_144595]  
-4.12 **NM\_033402** Homo sapiens KIAA1764 protein (KIAA1764), mRNA [NM\_033402]  
-4.10 **NM\_001172** Homo sapiens arginase, type II (ARG2), nuclear gene encoding mitochondrial protein, mRNA [NM\_001172]  
-4.10 **NM\_001914** Homo sapiens cytochrome b-5 (CYB5), transcript variant 2, mRNA [NM\_001914]  
-4.10 **NM\_002751** Homo sapiens mitogen-activated protein kinase 11 (MAPK11), transcript variant 1, mRNA [NM\_002751]  
-4.10 **NM\_003280** Homo sapiens transducin-like enhancer of split 2 (E(spl) homolog, Drosophila) (TLE2), mRNA [NM\_003280]  
-4.10 **NM\_014905** Homo sapiens glutaminase (GLS), mRNA [NM\_014905]  
-4.05 **NM\_080430** Homo sapiens selenoprotein M (SELM), mRNA [NM\_080430]  
-4.03 **NM\_005940** Homo sapiens matrix metalloproteinase 11 (stromelysin 3) (MMP11), mRNA [NM\_005940]  
-4.03 **NM\_019120** Homo sapiens protocadherin beta 8 (PCDH8), mRNA [NM\_019120]  
-4.02 **NM\_033120** Homo sapiens naked cuticle homolog 2 (Drosophila) (NKD2), mRNA [NM\_033120]

-4.00 NM\_014685 Homo sapiens homocysteine-inducible, endoplasmic reticulum stress-inducible, ubiquitin-like domain member 1 (HERPUD1), transcript variant 1, mRNA [NM\_014685]  
-4.00 **NM\_032246** Homo sapiens ring finger and KH domain containing 3 (RKH3), mRNA [NM\_032246]  
-3.98 NM\_025268 Homo sapiens hole gene (MGC4659), mRNA [NM\_025268]  
-3.97 NM\_022370 Homo sapiens roundabout, axon guidance receptor, homolog 3 (Drosophila) (ROBO3), mRNA [NM\_022370]  
-3.92 NM\_004574 Homo sapiens septin 4 (SEPT4), transcript variant 1, mRNA [NM\_004574]  
-3.92 NM\_178568 Homo sapiens reticulon 4 receptor-like 1 (RTN4RL1), mRNA [NM\_178568]  
-3.92 NM\_198469 Homo sapiens chromosome 9 open reading frame 18 (C9orf18), mRNA [NM\_198469]  
-3.91 NM\_001958 Homo sapiens eukaryotic translation elongation factor 1 alpha 2 (EEF1A2), mRNA [NM\_001958]  
-3.91 NM\_018159 Homo sapiens nudix (nucleoside diphosphate linked moiety X)-type motif 11 (NUDT11), mRNA [NM\_018159]  
-3.89 **NM\_001005463** Homo sapiens early B-cell factor 3 (EBF3), mRNA [NM\_001005463]  
-3.89 NM\_005461 Homo sapiens v-maf musculoaponeurotic fibrosarcoma oncogene homolog B (avian) (MAFB), mRNA [NM\_005461]  
-3.89 **NM\_025248** Homo sapiens SNAP25-interacting protein (SNIP), mRNA [NM\_025248]  
-3.88 NM\_004086 Homo sapiens coagulation factor C homolog, cochlin (Limulus polyphemus) (COCH), mRNA [NM\_004086]  
-3.88 NM\_006179 Homo sapiens neurotrophin 5 (neurotrophin 4/5) (NTF5), mRNA [NM\_006179]  
-3.86 **NM\_003873** Homo sapiens neuropilin 1 (NRP1), transcript variant 1, mRNA [NM\_003873]  
-3.85 NM\_003835 Homo sapiens regulator of G-protein signalling 9 (RGS9), mRNA [NM\_003835]  
-3.83 NM\_006623 Homo sapiens phosphoglycerate dehydrogenase (PHGDH), mRNA [NM\_006623]  
-3.82 **NM\_001386** Homo sapiens dihydropyrimidinase-like 2 (DPYSL2), mRNA [NM\_001386]  
-3.80 NM\_019601 Homo sapiens sushi domain containing 2 (SUSD2), mRNA [NM\_019601]  
-3.80 NM\_033393 Homo sapiens KIAA1727 protein (KIAA1727), mRNA [NM\_033393]  
-3.79 NM\_018939 Homo sapiens protocadherin beta 6 (PCDH6), mRNA [NM\_018939]  
-3.79 NM\_022791 Homo sapiens matrix metalloproteinase 19 (MMP19), transcript variant rasi-6, mRNA [NM\_022791]  
-3.77 NM\_001155 Homo sapiens annexin A6 (ANXA6), transcript variant 1, mRNA [NM\_001155]  
-3.77 **NM\_018013** Homo sapiens hypothetical protein FLJ10159 (FLJ10159), mRNA [NM\_018013]  
-3.76 **NM\_020893** Homo sapiens KIAA1529 (KIAA1529), mRNA [NM\_020893]  
-3.76 **NM\_022658** Homo sapiens homeo box C8 (HOXC8), mRNA [NM\_022658]  
-3.75 NM\_000156 Homo sapiens guanidinacetate N-methyltransferase (GAMT), transcript variant 1, mRNA [NM\_000156]  
-3.75 NM\_005472 Homo sapiens potassium voltage-gated channel, Isk-related family, member 3 (KCNE3), mRNA [NM\_005472]  
-3.73 **NM\_001628** Homo sapiens aldo-keto reductase family 1, member B1 (aldose reductase) (AKR1B1), mRNA [NM\_001628]  
-3.73 NM\_153608 Homo sapiens zinc finger protein 114 (ZNF114), mRNA [NM\_153608]  
-3.73 NM\_203400 Homo sapiens similar to candidate mediator of the p53-dependent G2 arrest (LOC388394), mRNA [NM\_203400]  
-3.69 NM\_052858 Homo sapiens MARVEL domain containing 3 (MARVELD3), transcript variant 2, mRNA [NM\_052858]  
-3.69 NM\_152868 Homo sapiens potassium inwardly-rectifying channel, subfamily J, member 4 (KCNJ4), transcript variant 1, mRNA [NM\_152868]  
-3.69 NM\_153350 Homo sapiens F-box and leucine-rich repeat protein 16 (FBXL16), mRNA [NM\_153350]  
-3.68 **NM\_003159** Homo sapiens cyclin-dependent kinase-like 5 (CDKL5), mRNA [NM\_003159]  
-3.68 NM\_006383 Homo sapiens calcium and integrin binding family member 2 (CIB2), mRNA [NM\_006383]  
-3.68 **NM\_006426** Homo sapiens dihydropyrimidinase-like 4 (DPYSL4), mRNA [NM\_006426]  
-3.68 NM\_006741 Homo sapiens protein phosphatase 1, regulatory (inhibitor) subunit 1A (PPP1R1A), mRNA [NM\_006741]  
-3.68 NM\_014508 Homo sapiens apolipoprotein B mRNA editing enzyme, catalytic polypeptide-like 3C (APOBEC3C), mRNA [NM\_014508]  
-3.66 **NM\_182757** Homo sapiens IBR domain containing 2 (IBRDC2), mRNA [NM\_182757]  
-3.65 **NM\_004734** Homo sapiens doublecortin and CaM kinase-like 1 (DCAMKL1), mRNA [NM\_004734]  
-3.65 **NM\_138440** Homo sapiens siit-like 2 (Drosophila) (SLITL2), mRNA [NM\_138440]  
-3.64 NM\_198545 Homo sapiens hypothetical gene supported by AK07558; BC021296 (LOC374946), mRNA [NM\_198545]  
-3.62 **NM\_000857** Homo sapiens guanlylate cyclase 1, soluble, beta 3 (GUCY1B3), mRNA [NM\_000857]  
-3.61 NM\_003250 Homo sapiens thyroid hormone receptor, alpha (erythroblastic leukemia viral (v-erb-a) oncogene homolog, avian) (THRA), transcript variant 2, mRNA [NM\_003250]  
-3.61 NM\_207459 Homo sapiens FLJ35767 protein (FLJ35767), mRNA [NM\_207459]  
-3.60 NM\_014975 Homo sapiens microtubule associated serine/threonine kinase 1 (MAST1), mRNA [NM\_014975]  
-3.58 NM\_152421 Homo sapiens hypothetical protein MGC20262 (MGC20262), mRNA [NM\_152421]  
-3.58 **NM\_170672** Homo sapiens RAS guanyl releasing protein 3 (calcium and DAG-regulated) (RASGRP3), mRNA [NM\_170672]  
-3.57 NM\_012168 Homo sapiens F-box protein 2 (FBXO2), mRNA [NM\_012168]  
-3.57 NM\_145313 Homo sapiens RasGEF domain family, member 1A (RASGEF1A), mRNA [NM\_145313]  
-3.55 **NM\_001001671** Homo sapiens mitogen-activated protein kinase kinase kinase 15 (MAP3K15), mRNA [NM\_001001671]  
-3.55 **NM\_017982** Homo sapiens sushi domain containing 4 (SUSD4), mRNA [NM\_017982]  
-3.53 NM\_014553 Homo sapiens transcription factor CP2-like 1 (TFCP2L1), mRNA [NM\_014553]  
-3.52 NM\_019858 Homo sapiens gene rich cluster, A gene (GRCA), transcript variant A-2, mRNA [NM\_019858]  
-3.52 **NM\_199461** Homo sapiens nanos homolog 1 (Drosophila) (NANOS1), transcript variant 1, mRNA [NM\_199461]  
-3.51 **NM\_018296** Homo sapiens leucine rich repeat containing 36 (LRRC36), mRNA [NM\_018296]  
-3.50 NM\_004968 Homo sapiens islet cell autoantigen 1, 69kDa (ICA1), transcript variant 2, mRNA [NM\_004968]  
-3.50 **NM\_033510** Homo sapiens dispatched homolog 2 (Drosophila) (DISP2), mRNA [NM\_033510]  
-3.48 NM\_001754 Homo sapiens runt-related transcription factor 1 (RUNX1), transcript variant 1, mRNA [NM\_001754]  
-3.47 **NM\_000187** Homo sapiens homogentisate 1,2-dioxygenase (homogentisate oxidase) (HGD), mRNA [NM\_000187]  
-3.47 NM\_021114 Homo sapiens serine protease inhibitor, Kazal type 2 (acrosin-trypsin inhibitor) (SPINK2), mRNA [NM\_021114]  
-3.47 **NM\_024581** Homo sapiens chromosome 6 open reading frame 60 (C6orf60), mRNA [NM\_024581]  
-3.47 **NM\_170741** Homo sapiens potassium inwardly-rectifying channel, subfamily J, member 16 (KCNJ16), transcript variant 2, mRNA [NM\_170741]  
-3.46 NM\_003810 Homo sapiens tumor necrosis factor (ligand) superfamily, member 10 (TNFSF10), mRNA [NM\_003810]  
-3.46 NM\_018099 Homo sapiens male sterility domain containing 1 (MLSTD1), mRNA [NM\_018099]  
-3.45 **NM\_006207** Homo sapiens platelet-derived growth factor receptor-like (PDGFRL), mRNA [NM\_006207]  
-3.45 NM\_145298 Homo sapiens apolipoprotein B mRNA editing enzyme, catalytic polypeptide-like 3F (APOBEC3F), transcript variant 1, mRNA [NM\_145298]  
-3.44 NM\_030786 Homo sapiens syncoilin, intermediate filament 1 (SYNC1), mRNA [NM\_030786]  
-3.42 **NM\_002220** Homo sapiens inositol 1,4,5-trisphosphate 3-kinase A (ITPKA), mRNA [NM\_002220]  
-3.41 NM\_001153 Homo sapiens annexin A4 (ANXA4), mRNA [NM\_001153]  
-3.41 **NM\_024336** Homo sapiens iroquois homeobox protein 3 (IRX3), mRNA [NM\_024336]  
-3.41 **NM\_194430** Homo sapiens ribonuclease, RNase A family, 4 (RNASE4), transcript variant 1, mRNA [NM\_194430]  
-3.40 **NM\_001635** Homo sapiens amphiphysin (Stiff-Man syndrome with breast cancer 128kDa autoantigen) (AMPH), transcript variant 1, mRNA [NM\_001635]  
-3.40 **NM\_004737** Homo sapiens like-glycosyltransferase (LARGE), transcript variant 1, mRNA [NM\_004737]  
-3.40 **NM\_020190** Homo sapiens olfactomedin-like 3 (OLFM3), mRNA [NM\_020190]  
-3.39 NM\_000855 Homo sapiens guanlylate cyclase 1, soluble, alpha 2 (GUCY1A2), mRNA [NM\_000855]  
-3.39 **NM\_052907** Homo sapiens KIAA1906 protein (KIAA1906), mRNA [NM\_052907]  
-3.39 NM\_173549 Homo sapiens hypothetical protein FLJ39553 (FLJ39553), mRNA [NM\_173549]  
-3.38 **NM\_020650** Homo sapiens reticulocalbin 3, EF-hand calcium binding domain (RCN3), mRNA [NM\_020650]  
-3.36 NM\_001005356 Homo sapiens protein expressed in prostate, ovary, testis, and placenta 14 (POTE14), transcript variant POTE-14A, mRNA [NM\_001005356]  
-3.36 **NM\_002087** Homo sapiens granulin (GRN), transcript variant 1, mRNA [NM\_002087]

-3.36 NM\_020139 Homo sapiens dehydrogenase/reductase (SDR family) member 6 (DHRS6), mRNA [NM\_020139]  
-3.36 NM\_153498 Homo sapiens calcium/calmodulin-dependent protein kinase ID (CAMK1D), transcript variant 2, mRNA [NM\_153498]  
-3.34 NM\_002222 Homo sapiens inositol 1,4,5-triphosphate receptor, type 1 (ITPR1), mRNA [NM\_002222]  
-3.33 NM\_005618 Homo sapiens delta-like 1 (Drosophila) (DLL1), mRNA [NM\_005618]  
-3.33 NM\_030807 Homo sapiens solute carrier family 2 (facilitated glucose transporter), member 11 (SLC2A11), transcript variant 1, mRNA [NM\_030807]  
-3.31 NM\_001001872 Homo sapiens chromosome 14 open reading frame 37 (C14orf37), mRNA [NM\_001001872]  
-3.30 NM\_020452 Homo sapiens ATPase, Class I, type 8B, member 2 (ATP8B2), transcript variant 1, mRNA [NM\_020452]  
-3.30 NM\_032432 Homo sapiens actin binding LIM protein family, member 2 (ABLIM2), mRNA [NM\_032432]  
-3.29 NM\_015544 Homo sapiens DKFZP564K1964 protein (DKFZP564K1964), mRNA [NM\_015544]  
-3.28 NM\_013310 Homo sapiens chromosome 2 open reading frame 27 (C2orf27), mRNA [NM\_013310]  
-3.27 NM\_001299 Homo sapiens calponin 1, basic, smooth muscle (CNN1), mRNA [NM\_001299]  
-3.27 NM\_014010 Homo sapiens astrotactin 2 (ASTN2), transcript variant 1, mRNA [NM\_014010]  
-3.27 NM\_014906 Homo sapiens protein phosphatase 1E (PP2C domain containing) (PPM1E), mRNA [NM\_014906]  
-3.27 NM\_022912 Homo sapiens chromosome 2 open reading frame 23 (C2orf23), mRNA [NM\_022912]  
-3.27 NM\_080743 Homo sapiens serine-arginine repressor protein (35 kDa) (SRp35), mRNA [NM\_080743]  
-3.27 NM\_145793 Homo sapiens GDNF family receptor alpha 1 (GFRA1), transcript variant 2, mRNA [NM\_145793]  
-3.26 NM\_024897 Homo sapiens progesterin and adipoQ receptor family member VI (PAQR6), transcript variant 1, mRNA [NM\_024897]  
-3.25 NM\_022343 Homo sapiens chromosome 9 open reading frame 19 (C9orf19), mRNA [NM\_022343]  
-3.25 NM\_178546 Homo sapiens hypothetical protein LOC339483 (LOC339483), mRNA [NM\_178546]  
-3.24 NM\_005442 Homo sapiens eomesodermin homolog (Xenopus laevis) (EOMES), mRNA [NM\_005442]  
-3.24 NM\_016651 Homo sapiens dapper, antagonist of beta-catenin, homolog 1 (Xenopus laevis) (DACT1), mRNA [NM\_016651]  
-3.24 NM\_152688 Homo sapiens KH domain containing, RNA binding, signal transduction associated 2 (KHDRBS2), mRNA [NM\_152688]  
-3.23 NM\_153487 Homo sapiens MAM domain containing glycosylphosphatidylinositol anchor 1 (MDGA1), mRNA [NM\_153487]  
-3.21 NM\_025212 Homo sapiens CXXC finger 4 (CXXC4), mRNA [NM\_025212]  
-3.19 NM\_015263 Homo sapiens Dmx-like 2 (DMXL2), mRNA [NM\_015263]  
-3.19 NM\_018896 Homo sapiens calcium channel, voltage-dependent, alpha 1G subunit (CACNA1G), transcript variant 1, mRNA [NM\_018896]  
-3.19 NM\_033504 Homo sapiens transmembrane protein 54 (TMEM54), mRNA [NM\_033504]  
-3.19 NM\_152335 Homo sapiens chromosome 15 open reading frame 27 (C15orf27), mRNA [NM\_152335]  
-3.18 NM\_016356 Homo sapiens doublecortin domain containing 2 (DCDC2), mRNA [NM\_016356]  
-3.18 NM\_020639 Homo sapiens receptor-interacting serine-threonine kinase 4 (RIPK4), mRNA [NM\_020639]  
-3.18 NM\_033387 Homo sapiens family with sequence similarity 78, member A (FAM78A), mRNA [NM\_033387]  
-3.17 NM\_004852 Homo sapiens one cut domain, family member 2 (ONECUT2), mRNA [NM\_004852]  
-3.16 NM\_006884 Homo sapiens short stature homeobox 2 (SHOX2), transcript variant SHOX2a, mRNA [NM\_006884]  
-3.16 NM\_015570 Homo sapiens autism susceptibility candidate 2 (AUTS2), mRNA [NM\_015570]  
-3.15 NM\_016577 Homo sapiens RAB6B, member RAS oncogene family (RAB6B), mRNA [NM\_016577]  
-3.14 NM\_015915 Homo sapiens spastic paraplegia 3A (autosomal dominant) (SPG3A), mRNA [NM\_015915]  
-3.14 NM\_017763 Homo sapiens hypothetical protein FLJ20315 (FLJ20315), mRNA [NM\_017763]  
-3.13 NM\_000093 Homo sapiens collagen, type V, alpha 1 (COL5A1), mRNA [NM\_000093]  
-3.13 NM\_004443 Homo sapiens EPH receptor B3 (EPHB3), mRNA [NM\_004443]  
-3.13 NM\_012219 Homo sapiens muscle RAS oncogene homolog (HRAS), mRNA [NM\_012219]  
-3.13 NM\_022471 Homo sapiens germ cell-less homolog 1 (Drosophila)-like (GMCL1L), mRNA [NM\_022471]  
-3.13 NM\_032777 Homo sapiens G protein-coupled receptor 124 (GPR124), mRNA [NM\_032777]  
-3.13 NM\_170693 Homo sapiens serum/glucocorticoid induced kinase 2 (SGK2), transcript variant 1, mRNA [NM\_170693]  
-3.12 NM\_001050 Homo sapiens somatostatin receptor 2 (SSTR2), mRNA [NM\_001050]  
-3.12 NM\_001072 Homo sapiens UDP glucuronosyltransferase 1 family, polypeptide A6 (UGT1A6), transcript variant 1, mRNA [NM\_001072]  
-3.11 NM\_003033 Homo sapiens ST3 beta-galactoside alpha-2,3-sialyltransferase 1 (ST3GAL1), transcript variant 1, mRNA [NM\_003033]  
-3.11 NM\_030781 Homo sapiens collectin sub-family member 12 (COLEC12), transcript variant II, mRNA [NM\_030781]  
-3.10 NM\_018931 Homo sapiens protocadherin beta 11 (PCDHB11), mRNA [NM\_018931]  
-3.10 NM\_033069 Homo sapiens chromosome 6 open reading frame 114 (C6orf114), mRNA [NM\_033069]  
-3.09 NM\_000044 Homo sapiens androgen receptor (dihydrotestosterone receptor; testicular feminization; spinal and bulbar muscular atrophy; Kennedy disease) (AR), transcript variant 1, mRNA [NM\_000044]  
-3.09 NM\_017565 Homo sapiens family with sequence similarity 20, member A (FAM20A), mRNA [NM\_017565]  
-3.08 NM\_001430 Homo sapiens endothelial PAS domain protein 1 (EPAS1), mRNA [NM\_001430]  
-3.08 NM\_005221 Homo sapiens distal-less homeo box 5 (DLX5), mRNA [NM\_005221]  
-3.07 NM\_001353 Homo sapiens aldo-keto reductase family 1, member C1 (dihydrodiol dehydrogenase 1; 20-alpha (3-alpha)-hydroxysteroid dehydrogenase) (AKR1C1), mRNA [NM\_001353]  
-3.07 NM\_145170 Homo sapiens tetra-tricopeptide repeat domain 18 (TTC18), mRNA [NM\_145170]  
-3.05 NM\_001007538 Homo sapiens transmembrane protein 46 (TMEM46), mRNA [NM\_001007538]  
-3.05 NM\_004672 Homo sapiens mitogen-activated protein kinase kinase kinase 6 (MAP3K6), mRNA [NM\_004672]  
-3.05 NM\_152429 Homo sapiens chromosome 10 open reading frame 13 (C10orf13), mRNA [NM\_152429]  
-3.04 NM\_001018084 Homo sapiens solute carrier family 26, member 10 (SLC26A10), mRNA [NM\_001018084]  
-3.04 NM\_016524 Homo sapiens synaptotagmin XVII (SYT17), mRNA [NM\_016524]  
-3.04 NM\_024893 Homo sapiens chromosome 20 open reading frame 39 (C20orf39), mRNA [NM\_024893]  
-3.03 NM\_053285 Homo sapiens tektin 1 (TEKT1), mRNA [NM\_053285]  
-3.02 NM\_000877 Homo sapiens interleukin 1 receptor, type I (IL1R1), mRNA [NM\_000877]  
-3.02 NM\_001012984 Homo sapiens hypothetical gene supported by BC032064; BC041612 (LOC388284), mRNA [NM\_001012984]  
-3.01 NM\_018242 Homo sapiens hypothetical protein FLJ10847 (FLJ10847), mRNA [NM\_018242]  
-3.01 NM\_020970 Homo sapiens KIAA1641 (KIAA1641), mRNA [NM\_020970]  
-3.01 NM\_207326 Homo sapiens hypothetical protein LOC149134 (LOC149134), mRNA [NM\_207326]  
-3.00 NM\_006086 Homo sapiens tubulin, beta 3 (TUBB3), mRNA [NM\_006086]  
-2.99 NM\_016389 Homo sapiens influenza virus NS1A binding protein (IVNS1ABP), transcript variant 2, mRNA [NM\_016389]  
-2.99 NM\_016588 Homo sapiens neuritin 1 (NRN1), mRNA [NM\_016588]  
-2.99 NM\_172387 Homo sapiens nuclear factor of activated T-cells, cytoplasmic, calcineurin-dependent 1 (NFATC1), transcript variant 3, mRNA [NM\_172387]  
-2.99 NM\_005447 Homo sapiens peptidylglycine alpha-amidating monooxygenase COOH-terminal interactor (PAMCI), mRNA [NM\_005447]  
-2.98 NM\_014909 Homo sapiens KIAA1036 (KIAA1036), mRNA [NM\_014909]  
-2.97 NM\_000142 Homo sapiens fibroblast growth factor receptor 3 (achondroplasia, thanatophoric dwarfism) (FGFR3), transcript variant 1, mRNA [NM\_000142]  
-2.96 NM\_001003395 Homo sapiens tumor protein D52-like 1 (TPD52L1), transcript variant 2, mRNA [NM\_001003395]  
-2.96 NM\_003102 Homo sapiens superoxide dismutase 3, extracellular (SOD3), mRNA [NM\_003102]  
-2.95 NM\_001024660 Homo sapiens kalinin, RhoGEF kinase (KALRN), transcript variant 1, mRNA [NM\_001024660]  
-2.95 NM\_002436 Homo sapiens membrane protein, palmitoylated 1, 55kDa (MPP1), mRNA [NM\_002436]  
-2.95 NM\_025225 Homo sapiens adiponutrin (ADPN), mRNA [NM\_025225]  
-2.95 NM\_030576 Homo sapiens hypothetical protein MGC10986 (MGC10986), mRNA [NM\_030576]  
-2.93 NM\_002135 Homo sapiens nuclear receptor subfamily 4, group A, member 1 (NR4A1), transcript variant 1, mRNA [NM\_002135]  
-2.93 NM\_175856 Homo sapiens chondroitin sulfate synthase 3 (CSS3), mRNA [NM\_175856]

-2.92 NM\_014237 Homo sapiens a disintegrin and metalloproteinase domain 18 (ADAM18), mRNA [NM\_014237]  
-2.92 NM\_152727 Homo sapiens copine II (CPNE2), mRNA [NM\_152727]  
-2.92 NM\_001089 Homo sapiens ATP-binding cassette, sub-family A (ABC1), member 3 (ABCA3), mRNA [NM\_001089]  
-2.92 NM\_012156 Homo sapiens erythrocyte membrane protein band 4.1-like 1 (EPB41L1), transcript variant 1, mRNA [NM\_012156]  
-2.91 NM\_006460 Homo sapiens hexamethylene bis-acetamide inducible 1 (HEXIM1), mRNA [NM\_006460]  
-2.91 NM\_031302 Homo sapiens glycosyltransferase 8 domain containing 2 (GLT8D2), mRNA [NM\_031302]  
-2.90 NM\_015529 Homo sapiens monoxygenase, DBH-like 1 (MOXD1), mRNA [NM\_015529]  
-2.90 NM\_020299 Homo sapiens aldo-keto reductase family 1, member B10 (aldose reductase) (AKR1B10), mRNA [NM\_020299]  
-2.90 NM\_145802 Homo sapiens sepin 6 (SEPT6), transcript variant V, mRNA [NM\_145802]  
-2.89 NM\_000218 Homo sapiens potassium voltage-gated channel, KQT-like subfamily, member 1 (KCNQ1), transcript variant 1, mRNA [NM\_000218]  
-2.87 NM\_002107 Homo sapiens H3 histone, family 3A (H3F3A), mRNA [NM\_002107]  
-2.87 NM\_052923 Homo sapiens zinc finger protein 452 (ZNF452), mRNA [NM\_052923]  
-2.86 NM\_020379 Homo sapiens mannosidase, alpha, class 1C, member 1 (MAN1C1), mRNA [NM\_020379]  
-2.85 NM\_016423 Homo sapiens zinc finger protein 219 (ZNF219), mRNA [NM\_016423]  
-2.83 NM\_000352 Homo sapiens ATP-binding cassette, sub-family C (CFTR/MRP), member 8 (ABCC8), mRNA [NM\_000352]  
-2.83 NM\_003268 Homo sapiens toll-like receptor 5 (TLR5), mRNA [NM\_003268]  
-2.83 NM\_152547 Homo sapiens butyrophilin-like 9 (BTNLI9), mRNA [NM\_152547]  
-2.82 NM\_001005359 Homo sapiens protein expressed in prostate, ovary, testis, and placenta 2 (POTE2), transcript variant POTE-2D, mRNA [NM\_001005359]  
-2.82 NM\_016619 Homo sapiens placenta-specific 8 (PLAC8), mRNA [NM\_016619]  
-2.82 NM\_020630 Homo sapiens ret proto-oncogene (multiple endocrine neoplasia and medullary thyroid carcinoma 1, Hirschsprung disease) (RET), transcript variant 4, mRNA [NM\_020630]  
-2.82 NM\_182470 Homo sapiens pyruvate kinase, muscle (PKM2), transcript variant 2, mRNA [NM\_182470]  
-2.81 NM\_002334 Homo sapiens low density lipoprotein receptor-related protein 4 (LRP4), mRNA [NM\_002334]  
-2.81 NM\_024665 Homo sapiens transducin (beta)-like 1X-linked receptor 1 (TBL1XR1), mRNA [NM\_024665]  
-2.81 NM\_138370 Homo sapiens hypothetical protein BC007901 (LOC91461), mRNA [NM\_138370]  
-2.80 NM\_021992 Homo sapiens thymosin-like 8 (TMSL8), mRNA [NM\_021992]  
-2.80 NM\_152486 Homo sapiens sterile alpha motif domain containing 11 (SAMD11), mRNA [NM\_152486]  
-2.79 NM\_005727 Homo sapiens tetraspanin 1 (TSPAN1), mRNA [NM\_005727]  
-2.79 NM\_005737 Homo sapiens ADP-ribosylation factor-like 7 (ARL7), mRNA [NM\_005737]  
-2.79 NM\_015432 Homo sapiens pleckstrin homology domain containing, family G (with RhoGef domain) member 4 (PLEKHG4), mRNA [NM\_015432]  
-2.79 NM\_183422 Homo sapiens TSC22 domain family, member 1 (TSC22D1), transcript variant 1, mRNA [NM\_183422]  
-2.79 NM\_206927 Homo sapiens synaptotagmin-like 2 (SYTL2), transcript variant c, mRNA [NM\_206927]  
-2.78 NM\_024417 Homo sapiens ferredoxin reductase (FDXR), nuclear gene encoding mitochondrial protein, transcript variant 1, mRNA [NM\_024417]  
-2.77 NM\_005985 Homo sapiens snail homolog 1 (Drosophila) (SNAI1), mRNA [NM\_005985]  
-2.77 NM\_007006 Homo sapiens nudix (nucleoside diphosphate linked moiety X)-type motif 21 (NUDT21), mRNA [NM\_007006]  
-2.77 NM\_015892 Homo sapiens B cell RAG associated protein (GALNAC4S-6ST), mRNA [NM\_015892]  
-2.77 NM\_022149 Homo sapiens melanoma antigen family F, 1 (MAGEF1), mRNA [NM\_022149]  
-2.77 NM\_032932 Homo sapiens RAB11 family interacting protein 4 (class II) (RAB11FIP4), mRNA [NM\_032932]  
-2.75 NM\_018936 Homo sapiens protocadherin beta 2 (PCDHB2), mRNA [NM\_018936]  
-2.75 NM\_145239 Homo sapiens similar to lymphocyte antigen 6 complex, locus G5B; G5b protein; open reading frame 31 (LOC112476), mRNA [NM\_145239]  
-2.74 NM\_003118 Homo sapiens secreted protein, acidic, cysteine-rich (osteonectin) (SPARC), mRNA [NM\_003118]  
-2.72 NM\_003896 Homo sapiens ST3 beta-galactoside alpha-2,3-sialyltransferase 5 (ST3GAL5), mRNA [NM\_003896]  
-2.72 NM\_017636 Homo sapiens transient receptor potential cation channel, subfamily M, member 4 (TRPM4), mRNA [NM\_017636]  
-2.72 NM\_002428 Homo sapiens matrix metalloproteinase 15 (membrane-inserted) (MMP15), mRNA [NM\_002428]  
-2.72 NM\_006059 Homo sapiens laminin, gamma 3 (LAMC3), mRNA [NM\_006059]  
-2.72 NM\_014149 Homo sapiens HSPC049 protein (HSPC049), mRNA [NM\_014149]  
-2.71 NM\_014972 Homo sapiens KIAA1049 protein (KIAA1049), mRNA [NM\_014972]  
-2.71 NM\_178519 Homo sapiens hypothetical protein FLJ39421 (FLJ39421), mRNA [NM\_178519]  
-2.68 NM\_002839 Homo sapiens protein tyrosine phosphatase, receptor type, D (PTPRD), transcript variant 1, mRNA [NM\_002839]  
-2.68 NM\_015569 Homo sapiens dynamin 3 (DNM3), mRNA [NM\_015569]  
-2.68 NM\_022910 Homo sapiens NDRG family member 4 (NDRG4), mRNA [NM\_022910]  
-2.67 NM\_139354 Homo sapiens megakaryocyte-associated tyrosine kinase (MATK), transcript variant 3, mRNA [NM\_139354]  
-2.67 NM\_173465 Homo sapiens collagen, type XXIII, alpha 1 (COL23A1), mRNA [NM\_173465]  
-2.67 NM\_001546 Homo sapiens inhibitor of DNA binding 4, dominant negative helix-loop-helix protein (ID4), mRNA [NM\_001546]  
-2.67 NM\_201525 Homo sapiens G protein-coupled receptor 56 (GPR56), transcript variant 3, mRNA [NM\_201525]  
-2.66 NM\_000152 Homo sapiens glucosidase, alpha, acid (Pompe disease, glycogen storage disease type II) (GAA), mRNA [NM\_000152]  
-2.66 NM\_018176 Homo sapiens leucine-rich repeat LGI family, member 2 (LGI2), mRNA [NM\_018176]  
-2.66 NM\_198859 Homo sapiens prickly-like 2 (Drosophila) (PRICKLE2), mRNA [NM\_198859]  
-2.65 NM\_020957 Homo sapiens protocadherin beta 16 (PCDHB16), mRNA [NM\_020957]  
-2.65 NM\_031410 Homo sapiens protocadherin alpha 1 (PCDH11), transcript variant 2, mRNA [NM\_031410]  
-2.65 NM\_019119 Homo sapiens protocadherin beta 9 (PCDHB9), mRNA [NM\_019119]  
-2.65 NM\_024608 Homo sapiens nei endonuclease VIII-like 1 (E. coli) (NEIL1), mRNA [NM\_024608]  
-2.64 NM\_001013711 Homo sapiens similar to hypothetical protein A230046P18: cDNA sequence BC055759 (LOC440905), mRNA [NM\_001013711]  
-2.64 NM\_002193 Homo sapiens inhibin, beta B (activin AB beta polypeptide) (INHBB), mRNA [NM\_002193]  
-2.64 NM\_016170 Homo sapiens T-cell leukemia, homeobox 2 (TLX2), transcript variant 1, mRNA [NM\_016170]  
-2.64 NM\_021603 Homo sapiens FXYD domain containing ion transport regulator 2 (FXYD2), transcript variant b, mRNA [NM\_021603]  
-2.62 NM\_002518 Homo sapiens neuronal PAS domain protein 2 (NPAS2), mRNA [NM\_002518]  
-2.62 NM\_004485 Homo sapiens guanine nucleotide binding protein (G protein), gamma 4 (GNNG4), mRNA [NM\_004485]  
-2.62 NM\_030802 Homo sapiens C/EBP-induced protein (LOC81558), mRNA [NM\_030802]  
-2.62 NM\_012334 Homo sapiens myosin X (MYO10), mRNA [NM\_012334]  
-2.62 NM\_181453 Homo sapiens GRIP and coiled-coil domain containing 2 (GCC2), transcript variant 1, mRNA [NM\_181453]  
-2.61 NM\_001932 Homo sapiens membrane protein, palmitoylated 3 (MAGUK p55 subfamily member 3) (MPP3), mRNA [NM\_001932]  
-2.61 NM\_022742 Homo sapiens hypothetical protein DKFZp434G156 (NAG6), mRNA [NM\_022742]  
-2.61 NM\_173849 Homo sapiens gooseoid (GSC), mRNA [NM\_173849]  
-2.60 NM\_014893 Homo sapiens neuroligin 4, Y-linked (NLGN4Y), mRNA [NM\_014893]  
-2.60 NM\_152679 Homo sapiens solute carrier family 10 (sodium/bile acid cotransporter family), member 4 (SLC10A4), mRNA [NM\_152679]  
-2.60 NM\_000221 Homo sapiens ketohexokinase (fructokinase) (KHK), transcript variant a, mRNA [NM\_000221]  
-2.60 NM\_005892 Homo sapiens formin-like 1 (FMNL1), mRNA [NM\_005892]  
-2.60 NM\_006042 Homo sapiens heparan sulfate (glucosamine) 3-O-sulfotransferase 3A1 (HS3ST3A1), mRNA [NM\_006042]  
-2.60 NM\_018649 Homo sapiens H2A histone family, member Y2 (H2AFY2), mRNA [NM\_018649]  
-2.59 NM\_003273 Homo sapiens transmembrane 7 superfamily member 2 (TM7SF2), mRNA [NM\_003273]  
-2.57 NM\_018988 Homo sapiens glucose-fructose oxidoreductase domain containing 1 (GFOD1), mRNA [NM\_018988]  
-2.56 NM\_145807 Homo sapiens hypothetical protein BC018697 (LOC126147), mRNA [NM\_145807]

-2.56 NM\_005345 Homo sapiens heat shock 70kDa protein 1A (HSPA1A), mRNA [NM\_005345]  
 -2.56 NM\_013364 Homo sapiens paraneoplastic antigen MA3 (PNMA3), mRNA [NM\_013364]  
 -2.55 NM\_001703 Homo sapiens brain-specific angiogenesis inhibitor 2 (BAI2), mRNA [NM\_001703]  
 -2.55 NM\_004881 Homo sapiens tumor protein p53 inducible protein 3 (TP53I3), transcript variant 1, mRNA [NM\_004881]  
 -2.55 NM\_014315 Homo sapiens kelch domain containing 2 (KLHDC2), mRNA [NM\_014315]  
 -2.55 NM\_017459 Homo sapiens microfilament-associated protein 2 (MFAP2), transcript variant 1, mRNA [NM\_017459]  
 -2.55 NM\_144608 Homo sapiens hexamethylene bis-acetamide inducible 2 (HEXIM2), mRNA [NM\_144608]  
 -2.54 NM\_002603 Homo sapiens phosphodiesterase 7A (PDE7A), transcript variant 1, mRNA [NM\_002603]  
 -2.54 NM\_138811 Homo sapiens chromosome 7 open reading frame 31 (C7orf31), mRNA [NM\_138811]  
 -2.54 NM\_023028 Homo sapiens fibroblast growth factor receptor 2 (bacteria-expressed kinase, keratinocyte growth factor receptor, craniofacial dysostosis 1, Crouzon syndrome, Pfeiffer syndrome, Jackson-Weiss syndrome) (FGFR2), transcript variant 10, mRNA [NM\_023028]  
 -2.53 NM\_020708 Homo sapiens solute carrier family 12, (potassium-chloride transporter) member 5 (SLC12A5), mRNA [NM\_020708]  
 -2.53 NM\_001005364 Homo sapiens protein expressed in prostate, ovary, testis, and placenta 2 (POTE2), transcript variant POTE-2B, mRNA [NM\_001005364]  
 -2.53 NM\_032445 Homo sapiens MEGF11 protein (MEGF11), mRNA [NM\_032445]  
 -2.53 NM\_194284 Homo sapiens claudin 23 (CLDN23), mRNA [NM\_194284]  
 -2.52 NM\_021219 Homo sapiens junctional adhesion molecule 2 (JAM2), mRNA [NM\_021219]  
 -2.52 NM\_022044 Homo sapiens stromal cell-derived factor 2-like 1 (SDF2L1), mRNA [NM\_022044]  
 -2.52 NM\_031885 Homo sapiens Bardet-Biedl syndrome 2 (BBS2), mRNA [NM\_031885]  
 -2.51 NM\_033131 Homo sapiens wingless-type MMTV integration site family, member 3A (WNT3A), mRNA [NM\_033131]  
 -2.51 NM\_138444 Homo sapiens potassium channel tetramerisation domain containing 12 (KCTD12), mRNA [NM\_138444]  
 -2.51 NM\_178439 Homo sapiens germ cell-less homolog 1 (Drosophila) (GCL), mRNA [NM\_178439]  
 -2.51 NM\_199165 Homo sapiens adenylosuccinate synthase like 1 (ADSSL1), transcript variant 1, mRNA [NM\_199165]  
 -2.51 NM\_001540 Homo sapiens heat shock 27kDa protein 1 (HSPB1), mRNA [NM\_001540]  
 -2.51 NM\_138379 Homo sapiens T-cell immunoglobulin and mucin domain containing 4 (TIMD4), mRNA [NM\_138379]  
 -2.50 NM\_005651 Homo sapiens tryptophan 2,3-dioxygenase (TDO2), mRNA [NM\_005651]  
 -2.49 NM\_005688 Homo sapiens ATP-binding cassette, sub-family C (CFTR/MRP), member 5 (ABCC5), transcript variant 1, mRNA [NM\_005688]  
 -2.49 NM\_020905 Homo sapiens ketch-like 14 (Drosophila) (KLHL14), mRNA [NM\_020905]  
 -2.49 NM\_138393 Homo sapiens chromosome 19 open reading frame 32 (C19orf32), mRNA [NM\_138393]  
 -2.49 NM\_001861 Homo sapiens cytochrome c oxidase subunit IV isoform 1 (COX4I1), mRNA [NM\_001861]  
 -2.48 NM\_002546 Homo sapiens tumor necrosis factor receptor superfamily, member 11b (osteoprotegerin) (TNFRSF11B), mRNA [NM\_002546]  
 -2.47 NM\_012109 Homo sapiens chromosome 19 open reading frame 4 (C19orf4), mRNA [NM\_012109]  
 -2.47 NM\_017893 Homo sapiens sema domain, immunoglobulin domain (Ig), transmembrane domain (TM) and short cytoplasmic domain, (semaphorin) 4G (SEMA4G), mRNA [NM\_017893]  
 -2.47 NM\_080744 Homo sapiens scavenger receptor cysteine rich domain containing, group B (4 domains) (SRCRB4D), mRNA [NM\_080744]  
 -2.46 NM\_172082 Homo sapiens calcium/calmodulin-dependent protein kinase (CaM kinase) II beta (CAMK2B), transcript variant 6, mRNA [NM\_172082]  
 -2.46 NM\_001024858 Homo sapiens spectrin, beta, erythrocytic (includes spherocytosis, clinical type I) (SPTB), transcript variant 1, mRNA [NM\_001024858]  
 -2.46 NM\_013434 Homo sapiens calsenilin, presenilin binding protein, EF-hand transcription factor (CSEN), mRNA [NM\_013434]  
 -2.45 NM\_021800 Homo sapiens DnaJ (Hsp40) homolog, subfamily C, member 12 (DNAJC12), transcript variant 1, mRNA [NM\_021800]  
 -2.44 NM\_024112 Homo sapiens chromosome 9 open reading frame 16 (C9orf16), mRNA [NM\_024112]  
 -2.43 NM\_052916 Homo sapiens ring finger protein 157 (RNF157), mRNA [NM\_052916]  
 -2.43 NM\_177400 Homo sapiens NK6 transcription factor related, locus 2 (Drosophila) (NKX6-2), mRNA [NM\_177400]  
 -2.42 NM\_001702 Homo sapiens brain-specific angiogenesis inhibitor 1 (BAI1), mRNA [NM\_001702]  
 -2.40 NM\_003713 Homo sapiens phosphatidic acid phosphatase type 2B (PPAP2B), transcript variant 1, mRNA [NM\_003713]  
 -2.40 NM\_138459 Homo sapiens chromosome 6 open reading frame 68 (C6orf68), mRNA [NM\_138459]  
 -2.40 NM\_000222 Homo sapiens v-kit Hardy-Zuckerman 4 feline sarcoma viral oncogene homolog (KIT), mRNA [NM\_000222]  
 -2.40 NM\_012259 Homo sapiens hairy/enhancer-of-split related with YRPW motif 2 (HEY2), mRNA [NM\_012259]  
 -2.39 NM\_031461 Homo sapiens cysteine-rich secretory protein LCCL domain containing 1 (CRISPLD1), mRNA [NM\_031461]  
 -2.39 NM\_001250 Homo sapiens CD40 antigen (TNF receptor superfamily member 5) (CD40), transcript variant 1, mRNA [NM\_001250]  
 -2.39 NM\_006324 Homo sapiens craniofacial development protein 1 (CFDP1), mRNA [NM\_006324]  
 -2.39 NM\_032866 Homo sapiens cingulin-like 1 (CGNL1), mRNA [NM\_032866]  
 -2.39 NM\_153334 Homo sapiens scavenger receptor class F, member 2 (SCARF2), transcript variant 1, mRNA [NM\_153334]  
 -2.37 NM\_000289 Homo sapiens phosphofructokinase, muscle (PFKM), mRNA [NM\_000289]  
 -2.37 NM\_003812 Homo sapiens a disintegrin and metalloproteinase domain 23 (ADAM23), mRNA [NM\_003812]  
 -2.37 NM\_014298 Homo sapiens quinolate phosphoribosyltransferase (nicotinate-nucleotide pyrophosphorylase (carboxylating)) (QPRT), mRNA [NM\_014298]  
 -2.36 NM\_005803 Homo sapiens flotillin 1 (FLOT1), mRNA [NM\_005803]  
 -2.36 NM\_004385 Homo sapiens chondroitin sulfate proteoglycan 2 (versican) (CSPG2), mRNA [NM\_004385]  
 -2.36 NM\_016642 Homo sapiens spectrin, beta, non-erythrocytic 5 (SPTBN5), mRNA [NM\_016642]  
 -2.36 NM\_032333 Homo sapiens chromosome 10 open reading frame 58 (C10orf58), mRNA [NM\_032333]  
 -2.35 NM\_006329 Homo sapiens fibulin 5 (FBLN5), mRNA [NM\_006329]  
 -2.35 NM\_033212 Homo sapiens hypothetical protein LOC92922 (MGC10992), mRNA [NM\_033212]  
 -2.35 NM\_000041 Homo sapiens apolipoprotein E (APOE), mRNA [NM\_000041]  
 -2.35 NM\_022974 Homo sapiens fibroblast growth factor receptor 2 (bacteria-expressed kinase, keratinocyte growth factor receptor, craniofacial dysostosis 1, Crouzon syndrome, Pfeiffer syndrome, Jackson-Weiss syndrome) (FGFR2), transcript variant 7, mRNA [NM\_022974]  
 -2.35 NM\_030926 Homo sapiens integral membrane protein 2C (ITMC2), transcript variant 1, mRNA [NM\_030926]  
 -2.34 NM\_023009 Homo sapiens MARCKS-like 1 (MARCKSL1), mRNA [NM\_023009]  
 -2.34 NM\_025080 Homo sapiens asparaginase like 1 (ASRGL1), mRNA [NM\_025080]  
 -2.34 NM\_001109 Homo sapiens a disintegrin and metalloproteinase domain 8 (ADAM8), mRNA [NM\_001109]  
 -2.34 NM\_057157 Homo sapiens cytochrome P450, family 26, subfamily A, polypeptide 1 (CYP26A1), transcript variant 2, mRNA [NM\_057157]  
 -2.34 NM\_152520 Homo sapiens zinc finger protein 533 (ZNF533), mRNA [NM\_152520]  
 -2.33 NM\_024967 Homo sapiens zinc finger protein 556 (ZNF556), mRNA [NM\_024967]  
 -2.33 NM\_203380 Homo sapiens acyl-CoA synthetase long-chain family member 5 (ACSL5), transcript variant 3, mRNA [NM\_203380]  
 -2.32 NM\_024676 Homo sapiens chromosome 1 open reading frame 113 (C1orf113), mRNA [NM\_024676]  
 -2.32 NM\_138924 Homo sapiens guanidinoacetate N-methyltransferase (GAMT), transcript variant 2, mRNA [NM\_138924]  
 -2.32 NM\_152739 Homo sapiens homeo box A9 (HOXA9), transcript variant 1, mRNA [NM\_152739]  
 -2.31 NM\_145244 Homo sapiens DNA-damage-inducible transcript 4-like (DDIT4L), mRNA [NM\_145244]  
 -2.30 NM\_002398 Homo sapiens Meis 1, myeloid ectotropic viral integration site 1 homolog (mouse) (MEIS1), mRNA [NM\_002398]  
 -2.30 NM\_004335 Homo sapiens bone marrow stromal cell antigen 2 (BST2), mRNA [NM\_004335]  
 -2.30 NM\_003573 Homo sapiens latent transforming growth factor beta binding protein 4 (LTBP4), mRNA [NM\_003573]  
 -2.30 NM\_016269 Homo sapiens lymphoid enhancer-binding factor 1 (LEF1), mRNA [NM\_016269]  
 -2.29 NM\_006818 Homo sapiens myeloid/lymphoid or mixed-lineage leukemia (t(17q21.31) myeloid/lymphoid) (TRIM24), mRNA [NM\_006818]  
 -2.29 NM\_017805 Homo sapiens Ras interacting protein 1 (RASIP1), mRNA [NM\_017805]  
 -2.29 NM\_000312 Homo sapiens protein C (inactivator of coagulation factors Va and VIIIa) (PROC), mRNA [NM\_000312]  
 -2.29 NM\_001005336 Homo sapiens dynamin 1 (DNM1), transcript variant 2, mRNA [NM\_001005336]  
 -2.28 NM\_003064 Homo sapiens secretory leukocyte protease inhibitor (antileukoprotease) (SLPI), mRNA [NM\_003064]  
 -2.28 NM\_133455 Homo sapiens EMI domain containing 1 (EMID1), mRNA [NM\_133455]

-2.28 **NM\_138396** Homo sapiens membrane-associated ring finger (C3HC4) 9 (MARCH9), mRNA [NM\_138396]  
-2.27 **NM\_005576** Homo sapiens lysyl oxidase-like 1 (LOXL1), mRNA [NM\_005576]  
-2.27 **NM\_001010854** Homo sapiens tetrapeptide repeat domain 7B (TTC7B), mRNA [NM\_001010854]  
-2.26 **NM\_021960** Homo sapiens myeloid cell leukemia sequence 1 (BCL2-related) (MCL1), transcript variant 1, mRNA [NM\_021960]  
-2.26 **NM\_012342** Homo sapiens BMP and activin membrane-bound inhibitor homolog (Xenopus laevis) (BAMBI), mRNA [NM\_012342]  
-2.25 **NM\_017842** Homo sapiens hypothetical protein FLJ20489 (FLJ20489), mRNA [NM\_017842]  
-2.25 **NM\_001333** Homo sapiens cathepsin L2 (CTSL2), mRNA [NM\_001333]  
-2.24 **NM\_003739** Homo sapiens aldo-keto reductase family 1, member C3 (3-alpha hydroxysteroid dehydrogenase, type II) (AKR1C3), mRNA [NM\_003739]  
-2.24 **NM\_173216** Homo sapiens ST6 beta-galactosamide alpha-2,6-sialyltransferase 1 (ST6GAL1), transcript variant 1, mRNA [NM\_173216]  
-2.23 **NM\_017899** Homo sapiens hypothetical protein FLJ20607 (TSC), mRNA [NM\_017899]  
-2.21 **NM\_014951** Homo sapiens zinc finger protein 365 (ZNF365), transcript variant A, mRNA [NM\_014951]  
-2.21 **NM\_181718** Homo sapiens hypothetical protein LOC253982 (LOC253982), mRNA [NM\_181718]  
-2.21 **NM\_172311** Homo sapiens stoned B/TFIIA-alpha/beta-like factor (SALF), mRNA [NM\_172311]  
-2.20 **NM\_021070** Homo sapiens latent transforming growth factor beta binding protein 3 (LTBP3), mRNA [NM\_021070]  
-2.19 **NM\_133443** Homo sapiens glutamic pyruvate transaminase (alanine aminotransferase) 2 (GPT2), mRNA [NM\_133443]  
-2.19 **NM\_023004** Homo sapiens reticulon 4 receptor (RTN4R), mRNA [NM\_023004]  
-2.19 **NM\_024812** Homo sapiens brain and acute leukemia, cytoplasmic (BAALC), transcript variant 1, mRNA [NM\_024812]  
-2.18 **NM\_207371** Homo sapiens FLJ45187 protein (FLJ45187), mRNA [NM\_207371]  
-2.18 **NM\_014669** Homo sapiens nucleoporin 93kDa (NUP93), mRNA [NM\_014669]  
-2.17 **NM\_207368** Homo sapiens hypothetical protein LOC348262 (LOC348262), mRNA [NM\_207368]  
-2.16 **NM\_145045** Homo sapiens hypothetical protein MGC20983 (MGC20983), mRNA [NM\_145045]  
-2.16 **NM\_182487** Homo sapiens olfactomedin-like 2A (OLFML2A), mRNA [NM\_182487]  
-2.16 **NM\_024333** Homo sapiens fibronectin type III and SPRY domain containing 1 (FSD1), mRNA [NM\_024333]  
-2.15 **NM\_021005** Homo sapiens nuclear receptor subfamily 2, group F, member 2 (NR2F2), mRNA [NM\_021005]  
-2.15 **NM\_145173** Homo sapiens DIRAS family, GTP-binding RAS-like 1 (DIRAS1), mRNA [NM\_145173]  
-2.15 **NM\_015069** Homo sapiens zinc finger protein 423 (ZNF423), mRNA [NM\_015069]  
-2.14 **NM\_001008392** Homo sapiens CTD (carboxy-terminal domain, RNA polymerase II, polypeptide A) small phosphatase-like (CTDSPL), transcript variant 1, mRNA [NM\_001008392]  
-2.14 **NM\_194303** Homo sapiens chromosome 10 open reading frame 39 (C10orf39), mRNA [NM\_194303]  
-2.13 **NM\_017573** Homo sapiens proprotein convertase subtilisin/kexin type 4 (PCSK4), mRNA [NM\_017573]  
-2.13 **NM\_000435** Homo sapiens notch3 (NOTCH3), mRNA [NM\_000435]  
-2.12 **NM\_024882** Homo sapiens chromosome 6 open reading frame 155 (C6orf155), mRNA [NM\_024882]  
-2.11 **NM\_000313** Homo sapiens protein S (alpha) (PROS1), mRNA [NM\_000313]  
-2.11 **NM\_001678** Homo sapiens ATPase, Na+/K+ transporting, beta 2 polypeptide (ATP1B2), mRNA [NM\_001678]  
-2.11 **NM\_025195** Homo sapiens tribbles homolog 1 (Drosophila) (TRIB1), mRNA [NM\_025195]  
-2.11 **NM\_173642** Homo sapiens family with sequence similarity 80, member A (FAM80A), mRNA [NM\_173642]  
-2.10 **NM\_015251** Homo sapiens ATM/ATR-Substrate Chk2-Interacting Zn2+-finger protein (ASCI2), mRNA [NM\_015251]  
-2.09 **NM\_000899** Homo sapiens KIT ligand (KITLG), transcript variant b, mRNA [NM\_000899]  
-2.09 **NM\_016931** Homo sapiens NADPH oxidase 4 (NOX4), mRNA [NM\_016931]  
-2.07 **NM\_001698** Homo sapiens AU RNA binding protein/enoyl-Coenzyme A hydratase (AUH), nuclear gene encoding mitochondrial protein, mRNA [NM\_001698]  
-2.07 **NM\_003532** Homo sapiens histone 1, H3e (HIST1H3E), mRNA [NM\_003532]  
-2.07 **NM\_003851** Homo sapiens cellular repressor of E1A-stimulated genes 1 (CREG1), mRNA [NM\_003851]  
-2.05 **NM\_005721** Homo sapiens ARP3 actin-related protein 3 homolog (yeast) (ACTR3), mRNA [NM\_005721]  
-2.05 **NM\_145038** Homo sapiens CG10959-like (MGC16372), mRNA [NM\_145038]  
-2.05 **NM\_004350** Homo sapiens runt-related transcription factor 3 (RUNX3), mRNA [NM\_004350]  
-2.04 **NM\_001189** Homo sapiens bagpipe homeobox homolog 1 (Drosophila) (BAPX1), mRNA [NM\_001189]  
-2.04 **NM\_000821** Homo sapiens gamma-glutamyl carboxylase (GGCX), mRNA [NM\_000821]
